# Supplementary material for: Tinkering Cis Motifs Jigsaw Puzzle Led to Root-Specific Drought-Inducible Novel Synthetic Promoters
Source: MDPI journal article supplement (doi:10.3390/ijms21041357), 2020-02-18
Supplement: s1 [file s1]

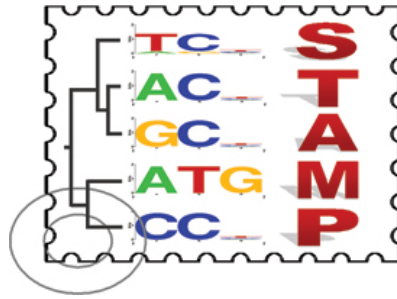

Jump to: [Multiple Alignment](#) [Motif Tree](#) [Motif Matching](#)

Input file: 72 motifs loaded

Settings: Metric=PCC, Alignment=SWU, Gap-open=1000, Gap-extend=1000, -nooverlapalign

Multiple Alignment=IR, Tree=UPGMA, Matching against: AGRIS

Note: All results files are removed nightly at midnight EST. Please save your results by saving "Webpage, complete".

[Download results as a PDF](#)

[Click here to run STAMP again.](#)

## Multiple Alignment

(Consensus sequence representations shown, but multiple alignment was carried out on the matrices)

```
meme_cluster3_1: -----CRCCTCMACA-----
biop_10_cluster1_1: -----CACGTGNC-----
biop_10_cluster1_2: -----CACGTGNC-----
biop_10_cluster1_3: -----CCCYCWCYCC-----
aa_10_cluster3_1: -----WAAAAAAWAA-----
aa_10_cluster3_2: -----AAAAAWAANWWAAWAWAWA
meme_cluster4_1: -----GNCSCCACY-----
meme_cluster4_2: -----RKNMGACGTGKC-----
meme_cluster4_3: -----CCCNACCC-----
meme_cluster4_4: -----GMCACGTGKCNNY-----
meme_cluster4_5: -----MCACGTGKCNCN-----
aa_10_cluster2_1: -----AAAAAAAAA-----
aa_10_cluster2_2: -----TTWWWWWNWAAWWAWT-----
aa_10_cluster2_3: -----AANAWAAAATWAAWWAAAAAWAW--
aa_10_cluster2_4: -----TWWWWAWTTTTAAAW-----
aa_10_cluster2_5: -----MCACGTGK-----
con_10_cluster4_1: -----GSNSCCACG-----
con_10_cluster4_2: -----RKNMGACGTGKC-----
con_10_cluster4_3: -----SGCSACACKNNNC-----
con_10_cluster4_4: -----GSYGCCACGY-----
con_10_cluster4_5: -----TGKCGMCACS-----
meme_cluster1_1: -----YCWCTCNYCC-----
meme_cluster1_2: -----GNCACGTGNC-----
```

## Stamp Results

09/28/15

```

meme_cluster1_3: -----TYTYTYTCTC-----
meme_cluster1_4: -----CCNCNCNNYC-----
meme_cluster1_5: -----NNCACGTG-----
aa_10_all_cluster_1: -----AAAAAAAWA-----
aa_10_all_cluster_2: -----AAAAAWNAAW-----
aa_10_all_cluster_3: -----WWWWWWAAWTAATTWWWW-----
aa_10_all_cluster_4: -----AAAAATAAAAATAAW-----
aa_10_all_cluster_5: WWWWTTWWWWWWWWWAAAA-----
con_10_cluster1_1: -----CACGTGNN-----
con_10_cluster1_2: -----NNCACGTGNC-----
con_10_cluster1_3: -----CCCWCMCS-----
con_10_cluster1_4: -----CNCNCYYNCNY-----
con_10_cluster1_5: -----CACGTG-----
biop_10_all_cluster_: -----CCYNNCNNNCNCC-----
biop_10_all_clust_v2: -----CCYYYCNYYCNC-----
biop_10_all_clust_v3: -----CACGTG-----
biop_10_all_clust_v4: -----MCACGTG-----
meme_cluster2_1: -----MCACGTGK-----
meme_cluster2_2: -----GGGNSNSRCC-----
meme_cluster2_3: -----CACSCGCCSM-----
meme_cluster2_4: -----TYNCTCTCTC-----
meme_cluster2_5: -----RMCACGTGK-----
aa_10_cluster4_1: -----AAWWWWWWAAAAANWWA-----
aa_10_cluster4_2: -----ANNWNWAAAAANAWANW-----
aa_10_cluster4_3: -----TWWTAAAAWWWW-----
aa_10_cluster4_4: -----AAWWAWWWWWWWWWAAWAW-----
aa_10_cluster4_5: -----RKNGMCACGTGK-----
meme_all_cluster_1: -----MCACGTG-----
meme_all_cluster_2: -----CNCTYNYCCY-----
meme_all_cluster_3: -----CACGTG-----
meme_all_cluster_4: -----CACGTG-----
meme_all_cluster_5: -----AAAAAAAAA-----
biop_10_cluster2_1: -----CNCWCCMYC-----
biop_10_cluster2_2: -----CWCSYSNCCYC-----
biop_10_cluster2_3: -----RNSMCACS-----
biop_10_cluster2_4: -----CACGTG-----
biop_10_cluster3_1: -----GCAYSGYN SA-----
biop_10_cluster4_1: -----RKNGMCACGTGKC-----
biop_10_cluster4_2: -----RKNGMCACGTGKC-----
biop_10_cluster4_3: -----GSNGMCACGT-----
biop_10_cluster4_4: -----GMCACGTGNCNNY-----
biop_10_cluster4_5: -----NCNMCNCGTSNC-----
con_10_cluster3_1: -----RNGCANGGTGSN-----

```

```

con_10_cluster3_2: -----NGCACGKTGCG-----
aa_10_cluster1_1: -----AAAAAANAAW-----
aa_10_cluster1_2: ---TTTTTTTTTTTMMWNW-----
aa_10_cluster1_3: -----GNCACGTGNC-----
aa_10_cluster1_4: -----YYCCMNCNCNCNYYC-----
aa_10_cluster1_5: -----TCNCNNNCNCNNCCNNNC-----

```

**Familial Profile:**  
[\(click for matrix\)](#)

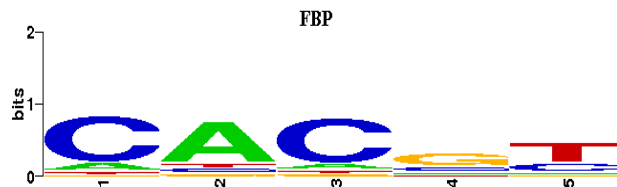

## Motif Tree

Tree (drawn by **Phylip**)

[Click here for Newick-format tree](#) (viewable with [MEGA](#))

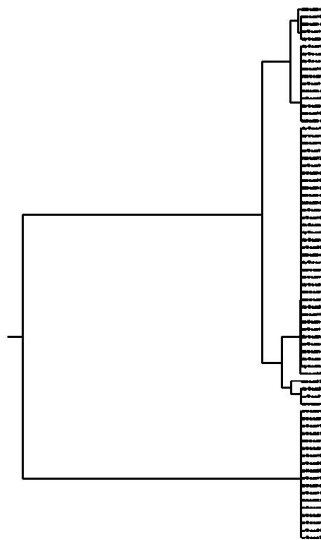

Input Motif

Best match in AGRIS

|                              |                                           |
|------------------------------|-------------------------------------------|
| <br><b>meme_cluster3_1</b>   | <br><b>RAV1-A</b><br>(E val: 4.2977e-04)  |
| <br><b>meme_cluster4_3</b>   | <br><b>MYB1</b><br>(E val: 6.5555e-04)    |
| <br><b>meme_cluster1_4</b>   | <br><b>SORLIP5</b><br>(E val: 1.8114e-04) |
| <br><b>con_10_cluster1_3</b> | <br><b>MYB</b><br>(E val: 1.1384e-02)     |

|                                                                                                                       |                                                                                                                                  |
|-----------------------------------------------------------------------------------------------------------------------|----------------------------------------------------------------------------------------------------------------------------------|
| 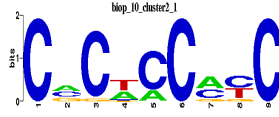 <p><u>biop_10_cluster2_1</u></p>   |  <p>E2F-variant<br/>(E val: 1.3407e-02)</p>   |
|  <p><u>biop_10_cluster1_3</u></p>   |  <p>SORLIP5<br/>(E val: 3.9003e-04)</p>       |
|  <p><u>biop_10_all_cluster</u></p>  |  <p>E2F-variant<br/>(E val: 1.0524e-03)</p>   |
|  <p><u>biop_10_all_clust_v2</u></p> |  <p>SORLIP5<br/>(E val: 7.4007e-03)</p>       |
|  <p><u>meme_cluster1_1</u></p>    |  <p>SORLIP5<br/>(E val: 2.3050e-04)</p>     |
|  <p><u>meme_all_cluster_2</u></p> |  <p>E2F-variant<br/>(E val: 2.3243e-03)</p> |
|  <p><u>con_10_cluster1_4</u></p>  |  <p>E2F-variant<br/>(E val: 4.7094e-05)</p> |
|  <p><u>aa_10_cluster1_4</u></p>   |  <p>SORLIP5<br/>(E val: 2.6287e-03)</p>     |
|                                                                                                                       |                                                                                                                                  |

|                                                                                                                       |                                                                                                                                |
|-----------------------------------------------------------------------------------------------------------------------|--------------------------------------------------------------------------------------------------------------------------------|
|  <p><u>aa_10_cluster1_5</u></p>     |  <p>SORLIP5<br/>(E val: 3.9470e-05)</p>     |
|  <p><u>biop_10_cluster2_2</u></p>   |  <p>E2F-variant<br/>(E val: 1.3850e-03)</p> |
|  <p><u>meme_cluster1_3</u></p>      |  <p>ARF<br/>(E val: 1.7015e-03)</p>         |
|  <p><u>meme_cluster2_4</u></p>      |  <p>SORLIP5<br/>(E val: 4.8964e-05)</p>     |
|  <p><u>biop_10_cluster1_1</u></p> |  <p>ABFs<br/>(E val: 4.9218e-11)</p>      |
|  <p><u>biop_10_cluster1_2</u></p> |  <p>ABFs<br/>(E val: 3.2649e-11)</p>      |
|  <p><u>meme_cluster1_5</u></p>    |  <p>ABFs<br/>(E val: 1.0318e-11)</p>      |
|  <p><u>con_10_cluster1_1</u></p>  |  <p>ABFs<br/>(E val: 6.1569e-12)</p>      |
|                                                                                                                       |                                                                                                                                |

|                                                                                                                      |                                                                                                                           |
|----------------------------------------------------------------------------------------------------------------------|---------------------------------------------------------------------------------------------------------------------------|
| 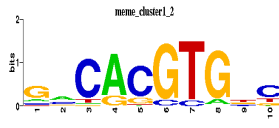 <p><u>meme_cluster1_2</u></p>     |  <p>ABFs<br/>(E val: 4.9057e-10)</p>   |
|  <p><u>con_10_cluster1_2</u></p>   |  <p>ABFs<br/>(E val: 3.5788e-10)</p>   |
|  <p><u>aa_10_cluster1_3</u></p>    |  <p>ABFs<br/>(E val: 1.2256e-10)</p>   |
|  <p><u>meme_cluster2_5</u></p>     |  <p>ABFs<br/>(E val: 3.6560e-11)</p>   |
|  <p><u>meme_cluster4_2</u></p>    |  <p>ABFs<br/>(E val: 4.5627e-10)</p>  |
|  <p><u>meme_cluster4_4</u></p>   |  <p>ABFs<br/>(E val: 2.9884e-10)</p> |
|  <p><u>meme_cluster4_5</u></p>   |  <p>ABFs<br/>(E val: 8.9105e-11)</p> |
|  <p><u>con_10_cluster4_2</u></p> |  <p>ABFs<br/>(E val: 4.5627e-10)</p> |
|                                                                                                                      |                                                                                                                           |

|                                                                                                                         |                                                                                                                            |
|-------------------------------------------------------------------------------------------------------------------------|----------------------------------------------------------------------------------------------------------------------------|
| 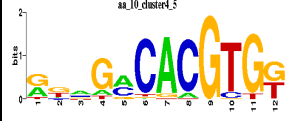 <p><u>aa_10_cluster4_5</u></p>       |  <p>ABFs<br/>(E val: 2.7376e-09)</p>    |
|  <p><u>biop_10_cluster4_1</u></p>     |  <p>ABFs<br/>(E val: 4.5627e-10)</p>    |
|  <p><u>biop_10_cluster4_2</u></p>     |  <p>ABFs<br/>(E val: 4.5627e-10)</p>    |
|  <p><u>biop_10_cluster4_4</u></p>     |  <p>ABFs<br/>(E val: 3.9958e-10)</p>    |
|  <p><u>aa_10_cluster2_5</u></p>     |  <p>G-box<br/>(E val: 4.2821e-09)</p> |
|  <p><u>meme_cluster2_1</u></p>      |  <p>G-box<br/>(E val: 4.3084e-09)</p> |
|  <p><u>biop_10_all_clust_v4</u></p> |  <p>G-box<br/>(E val: 1.2324e-09)</p> |
|  <p><u>meme_all_cluster_1</u></p>   |  <p>G-box<br/>(E val: 1.1774e-09)</p> |
|                                                                                                                         |                                                                                                                            |

|                                                                                                                                            |                                                                                                                                         |
|--------------------------------------------------------------------------------------------------------------------------------------------|-----------------------------------------------------------------------------------------------------------------------------------------|
| 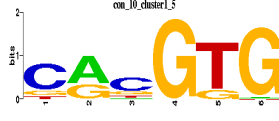 <p>con_10_cluster1_5</p> <p>con_10_cluster1_5</p>       |  <p>G-box</p> <p>G-box<br/>(E val: 4.5925e-10)</p>   |
|  <p>biop_10_all_clust_v3</p> <p>biop_10_all_clust_v3</p> |  <p>G-box</p> <p>G-box<br/>(E val: 6.2438e-11)</p>   |
|  <p>meme_all_cluster_4</p> <p>meme_all_cluster_4</p>     |  <p>G-box</p> <p>G-box<br/>(E val: 5.4745e-11)</p>   |
|  <p>meme_all_cluster_3</p> <p>meme_all_cluster_3</p>     |  <p>G-box</p> <p>G-box<br/>(E val: 5.9453e-11)</p>   |
|  <p>biop_10_cluster2_4</p> <p>biop_10_cluster2_4</p>   |  <p>G-box</p> <p>G-box<br/>(E val: 6.9934e-11)</p> |
|  <p>meme_cluster4_1</p> <p>meme_cluster4_1</p>         |  <p>ERF1</p> <p>ERF1<br/>(E val: 3.7384e-07)</p>   |
|  <p>con_10_cluster4_1</p> <p>con_10_cluster4_1</p>     |  <p>ABFs</p> <p>ABFs<br/>(E val: 2.5416e-05)</p>   |
|  <p>con_10_cluster4_4</p> <p>con_10_cluster4_4</p>     |  <p>ABFs</p> <p>ABFs<br/>(E val: 1.2568e-07)</p>   |
|                                                                                                                                            |                                                                                                                                         |



|                                                                                                                |                                                                                                          |
|----------------------------------------------------------------------------------------------------------------|----------------------------------------------------------------------------------------------------------|
| 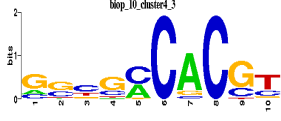 <p>biop_10_cluster4_3</p>   |  <p>ABFs</p>          |
| <p>biop_10_cluster4_3</p>                                                                                      | <p>ABFs<br/>(E val: 2.0624e-07)</p>                                                                      |
|  <p>con_10_cluster4_5</p>    |  <p>ABFs</p>          |
| <p>con_10_cluster4_5</p>                                                                                       | <p>ABFs<br/>(E val: 1.3922e-04)</p>                                                                      |
|  <p>con_10_cluster4_3</p>    |  <p>ACE</p>           |
| <p>con_10_cluster4_3</p>                                                                                       | <p>ACE<br/>(E val: 6.2490e-05)</p>                                                                       |
|  <p>biop_10_cluster4_5</p>   |  <p>ABFs</p>          |
| <p>biop_10_cluster4_5</p>                                                                                      | <p>ABFs<br/>(E val: 2.9123e-06)</p>                                                                      |
|  <p>biop_10_cluster2_3</p>  |  <p>ACE</p>          |
| <p>biop_10_cluster2_3</p>                                                                                      | <p>ACE<br/>(E val: 6.1809e-04)</p>                                                                       |
|  <p>meme_cluster2_3</p>    |  <p>E2F-variant</p> |
| <p>meme_cluster2_3</p>                                                                                         | <p>E2F-variant<br/>(E val: 3.9617e-06)</p>                                                               |
|  <p>meme_cluster2_2</p>    |  <p>ERF1</p>        |
| <p>meme_cluster2_2</p>                                                                                         | <p>ERF1<br/>(E val: 1.3269e-04)</p>                                                                      |
|  <p>biop_10_cluster3_1</p> |  <p>CBF1</p>        |
| <p>biop_10_cluster3_1</p>                                                                                      | <p>CBF1<br/>(E val: 8.9174e-03)</p>                                                                      |
|                                                                                                                |                                                                                                          |

|                                                                                                                        |                                                                                                                              |
|------------------------------------------------------------------------------------------------------------------------|------------------------------------------------------------------------------------------------------------------------------|
| 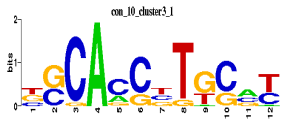 <p><u>con_10_cluster3_1</u></p>     |  <p>CArG2<br/>(E val: 1.7770e-03)</p>     |
|  <p><u>con_10_cluster3_2</u></p>     |  <p>ABFs<br/>(E val: 1.3651e-05)</p>      |
|  <p><u>aa_10_cluster3_1</u></p>      |  <p>CCA1_v3<br/>(E val: 6.6562e-06)</p>   |
|  <p><u>aa_10_all_cluster_1</u></p>   |  <p>CCA1_v3<br/>(E val: 7.1473e-08)</p>   |
|  <p><u>aa_10_cluster1_1</u></p>     |  <p>CCA1_v3<br/>(E val: 9.5610e-07)</p>  |
|  <p><u>aa_10_cluster2_1</u></p>    |  <p>CCA1_v3<br/>(E val: 2.7265e-07)</p> |
|  <p><u>meme_all_cluster_5</u></p>  |  <p>CCA1_v3<br/>(E val: 1.3989e-07)</p> |
|  <p><u>aa_10_all_cluster_2</u></p> |  <p>CCA1_v3<br/>(E val: 3.6212e-06)</p> |
|                                                                                                                        |                                                                                                                              |

|                                                                                                                        |                                                                                                                                                    |
|------------------------------------------------------------------------------------------------------------------------|----------------------------------------------------------------------------------------------------------------------------------------------------|
| 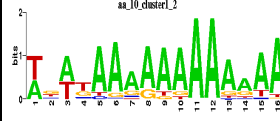 <p><u>aa_10_cluster1_2</u></p>      |  <p>CCA1_v3<br/>(E val: 1.8433e-04)</p>                         |
|  <p><u>aa_10_cluster3_2</u></p>      |  <p>CCA1_v3<br/>(E val: 6.8505e-06)</p>                         |
|  <p><u>aa_10_cluster2_3</u></p>      |  <p>CCA1_v3<br/>(E val: 2.1018e-05)</p>                         |
|  <p><u>aa_10_cluster4_1</u></p>      |  <p>Bellringer_replumless_pennywise<br/>(E val: 9.2666e-04)</p> |
|  <p><u>aa_10_cluster4_2</u></p>     |  <p>CCA1_v3<br/>(E val: 2.3128e-04)</p>                        |
|  <p><u>aa_10_cluster4_4</u></p>    |  <p>AGL3<br/>(E val: 3.9512e-05)</p>                          |
|  <p><u>aa_10_cluster2_2</u></p>    |  <p>AGL3<br/>(E val: 2.9105e-06)</p>                          |
|  <p><u>aa_10_all_cluster_5</u></p> |  <p>AGL3<br/>(E val: 1.6908e-06)</p>                          |
|                                                                                                                        |                                                                                                                                                    |

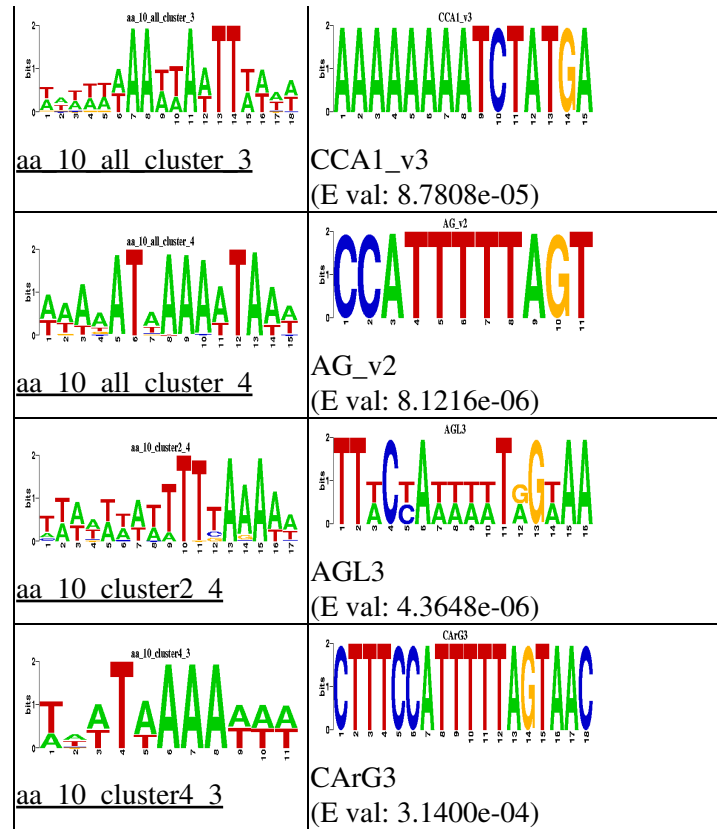

## Motif Similarity Matches

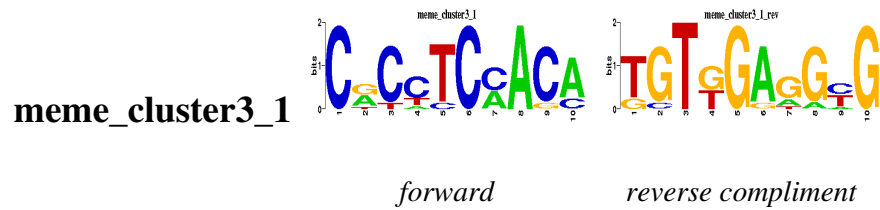

| Name   | E value    | Alignment                 | Motif                                                                                 |
|--------|------------|---------------------------|---------------------------------------------------------------------------------------|
| RAV1-A | 4.2977e-04 | CRCCTMACA<br>-----CAACA   |  |
| RAV1-B | 1.3312e-03 | TGTKGAGGYG<br>----CAGGTG  |  |
| TGA1   | 2.5764e-02 | -CRCCTMACA<br>CCACGTCA--- |  |

ERF1 2.9515e-02

TGTKGAGGYG  
---GGCGGC-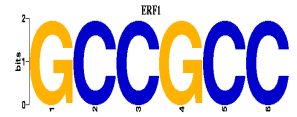

GCC-box 2.9515e-02

TGTKGAGGYG  
---GGCGGC-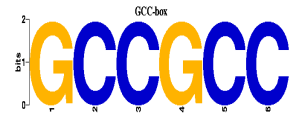

meme\_cluster4\_3

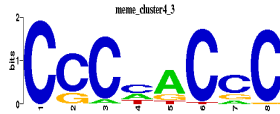*forward*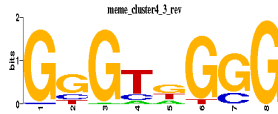*reverse compliment**Name**E value**Alignment**Motif*

MYB1

6.5555e-04

GGGTNGGG-  
-GGTWGGAK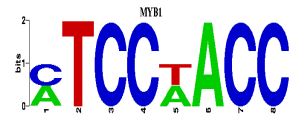

MYB

5.2232e-03

GGGTNGGG-  
-GKTWGGTK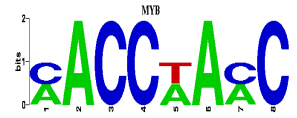

E2F-variant

1.1996e-02

GGGTNGGG--  
-GGCGGGAGA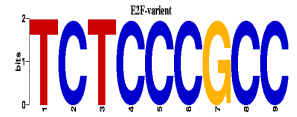

MRE

1.3447e-02

GGGTNGGG----  
TGGTAGGTTAGA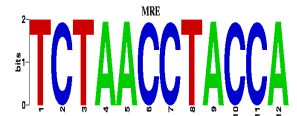

MYB4

1.8585e-02

CCCNACCC  
AMCWAMC-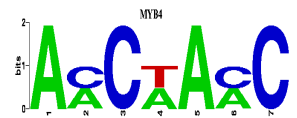

meme\_cluster1\_4

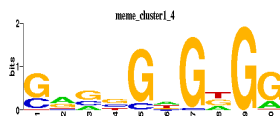*forward*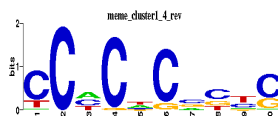*reverse compliment**Name**E value**Alignment**Motif*

## Stamp Results

09/28/15

|             |            |                                       |                                                                                     |
|-------------|------------|---------------------------------------|-------------------------------------------------------------------------------------|
| SORLIP5     | 1.8114e-04 | GRNNGNGNGG<br>GAGTGAG---              |  |
| E2F-varient | 3.9895e-02 | -GRNNGNGNGG<br>GGCGGGAGA--            |  |
| MYB4        | 6.2511e-02 | GRNNGNGNGG<br>--GKTWGKT-              |  |
| GT          | 7.6462e-02 | -----CCNCNCNNYC<br>CATATTAACCACACA--- |  |
| SORLIP1     | 9.1186e-02 | --CCNCNCNNYC<br>AGCCAC-----           |  |

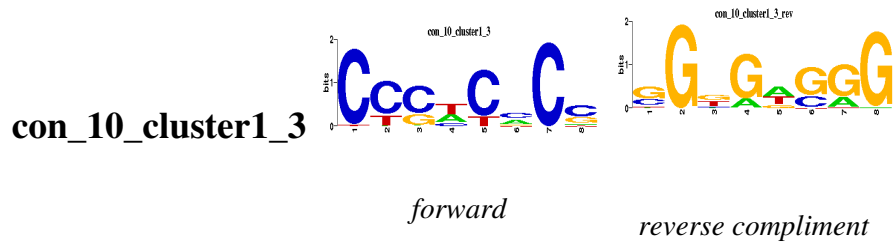

| <i>Name</i> | <i>E value</i> | <i>Alignment</i>         | <i>Motif</i>                                                                          |
|-------------|----------------|--------------------------|---------------------------------------------------------------------------------------|
| MYB         | 1.1384e-02     | SGKGWGGG-<br>-GKTWGGTK   |  |
| SORLIP5     | 1.2978e-02     | CCCWCMCS-<br>--CTCACTC   |  |
| Hexamer     | 2.1896e-02     | SGKGWGGG<br>--CGACGG     |  |
| E2F-varient | 2.4054e-02     | --SGKGWGGG<br>GGCGGGAGA- |  |

LTRE

2.8405e-02

SGKGWGGG--  
--TGTCGGT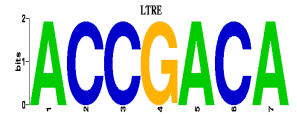

biop\_10\_cluster2\_1

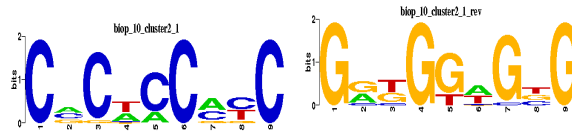*forward**reverse compliment**Name**E value**Alignment**Motif*

E2F-variant

1.3407e-02

--GRKGGWNG  
GGCGGGAGA--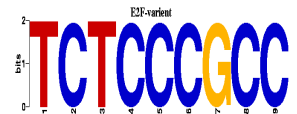

SORLIP5

1.4550e-02

--CNCWCCMYC  
CTCACTC----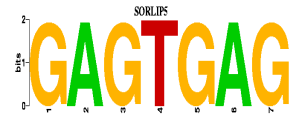

RAV1-B

8.3237e-02

--GRKGGWNG  
CAGGTG-----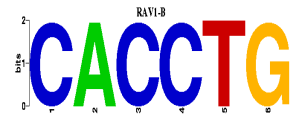

SORLIP4

8.8920e-02

CNCWCCMYC----  
----CCATCATA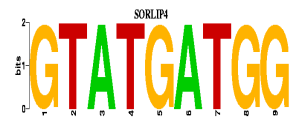

SORLIP1

9.4131e-02

CNCWCCMYC  
--AGCCAC--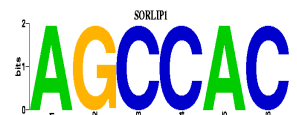

biop\_10\_cluster1\_3

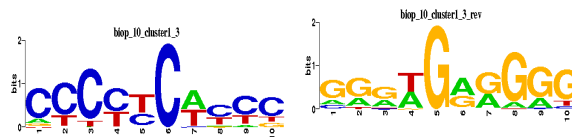*forward**reverse compliment**Name**E value**Alignment**Motif*

## Stamp Results

09/28/15

|             |            |                                |                                                                                     |
|-------------|------------|--------------------------------|-------------------------------------------------------------------------------------|
| SORLIP5     | 3.9003e-04 | GGRWGRRGGG<br>GAGTGAG---       |  |
| E2F-variant | 7.2098e-03 | ---GGRWGRRGGG<br>GGCGGGAGA---- |  |
| MYB1        | 1.5792e-02 | GGRWGRRGGG<br>GGTWGGA--        |  |
| SORLIP4     | 3.4084e-02 | CCCYCWYCC<br>-CCATCATAC        |  |
| RAV1-B      | 1.0313e-01 | CCCYCWYCC-<br>-----CACCTG      |  |

biop\_10\_all\_cluster\_

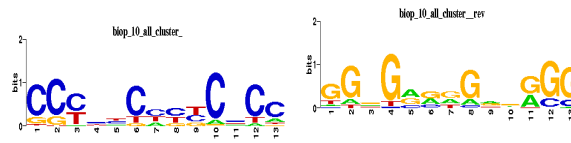*forward**reverse compliment*

| <i>Name</i> | <i>E value</i> | <i>Alignment</i>                     | <i>Motif</i>                                                                          |
|-------------|----------------|--------------------------------------|---------------------------------------------------------------------------------------|
| E2F-variant | 1.0524e-03     | GGNGNNNGNNRGG<br>--GGCGGGAGA--       |  |
| SORLIP5     | 1.9620e-03     | CCYNNCNNNCNCC<br>---CTCACTC---       |  |
| TEF-box     | 6.2993e-02     | -GGNGNNNGNNRGG--<br>AGGGGCATAATGGTAA |  |
| E2F         | 1.5702e-01     | -GGNGNNNGNNRGG<br>GCGGGAAA-----      |  |



E2F\_DP

1.5702e-01

—GGNGNNNGNNRGG  
GCGGGAAA-----

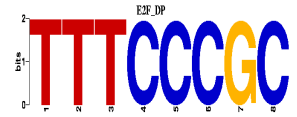

biop\_10\_all\_clust\_v2

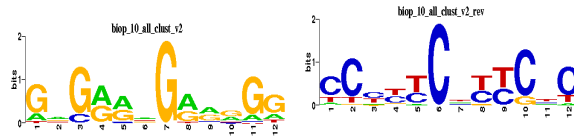*forward**reverse compliment*

| <i>Name</i> | <i>E value</i> | <i>Alignment</i>                        | <i>Motif</i> |
|-------------|----------------|-----------------------------------------|--------------|
| SORLIP5     | 7.4007e-03     | CCYYCNYYCNC<br>---CTCACTC--             |              |
| E2F-varient | 4.5482e-02     | —GNRRNGRRRGG<br>GGCGGGAGA----           |              |
| ARF         | 7.2518e-02     | GNRRNGRRRGG<br>GAGACA-----              |              |
| ARF1        | 7.2518e-02     | GNRRNGRRRGG<br>GAGACA-----              |              |
| CAR2        | 9.4405e-02     | --GNRRNGRRRGG----<br>TAATCCATGAAAGGTAAG |              |

meme\_cluster1\_1

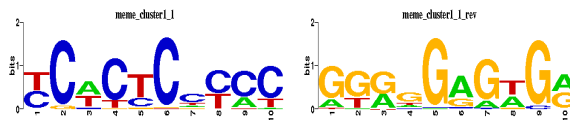*forward**reverse compliment*

| <i>Name</i> | <i>E value</i> | <i>Alignment</i> | <i>Motif</i> |
|-------------|----------------|------------------|--------------|
|-------------|----------------|------------------|--------------|

|             |            |                                                 |                                                                                     |
|-------------|------------|-------------------------------------------------|-------------------------------------------------------------------------------------|
| SORLIP5     | 2.3050e-04 | -YCWCTCNYCC<br>CTCACTC----                      |  |
| E2F-varient | 6.8582e-04 | YCWCTCNYCC-<br>--TCTCCCGCC                      |  |
| EIL1        | 2.1501e-02 | -----YCWCTCNYCC-----<br>TTCAAGATACATGCCCCCTTGAA |  |
| EIL2        | 2.1501e-02 | -----YCWCTCNYCC-----<br>TTCAAGATACATGCCCCCTTGAA |  |
| EIL3        | 2.1501e-02 | -----YCWCTCNYCC-----<br>TTCAAGATACATGCCCCCTTGAA |  |

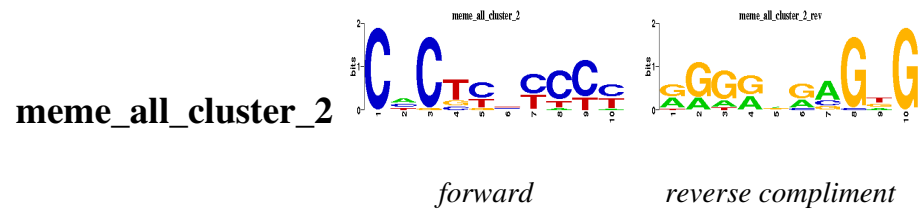

| Name        | E value    | Alignment                                      | Motif                                                                                 |
|-------------|------------|------------------------------------------------|---------------------------------------------------------------------------------------|
| E2F-varient | 2.3243e-03 | RGGRNRAGNG<br>GGCGGGAGA-                       |  |
| SORLIP5     | 5.7760e-03 | RGGRNRAGNG--<br>-----GAGTGAG                   |  |
| EIL1        | 2.1809e-02 | -----CNCTYNYCCY----<br>TTCAAGATACATGCCCCCTTGAA |  |
| EIL2        | 2.1809e-02 | -----CNCTYNYCCY----<br>TTCAAGATACATGCCCCCTTGAA |  |
| EIL3        | 2.1809e-02 | -----CNCTYNYCCY----<br>TTCAAGATACATGCCCCCTTGAA |  |

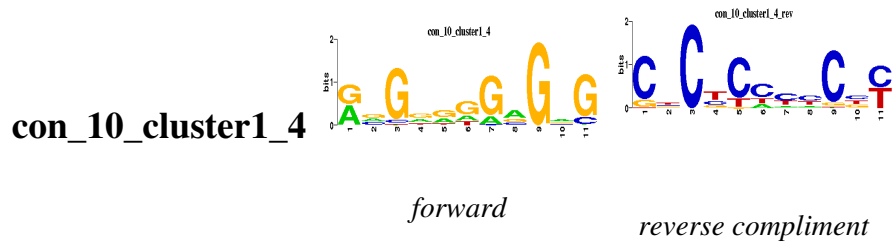

| Name        | E value    | Alignment                  | Motif |
|-------------|------------|----------------------------|-------|
| E2F-varient | 4.7094e-05 | RNGNRRGNGNG<br>-GGCGGGAGA- |       |
| SORLIP5     | 2.2573e-03 | RNGNRRGNGNG<br>--GAGTGAG-- |       |
| MYB1        | 3.1129e-02 | RNGNRRGNGNG<br>-GGTWGGAK-- |       |
| E2F         | 3.9542e-02 | CNCNCYNCNY<br>-TTTCCCGC--  |       |
| E2F_DP      | 3.9542e-02 | CNCNCYNCNY<br>-TTTCCCGC--  |       |

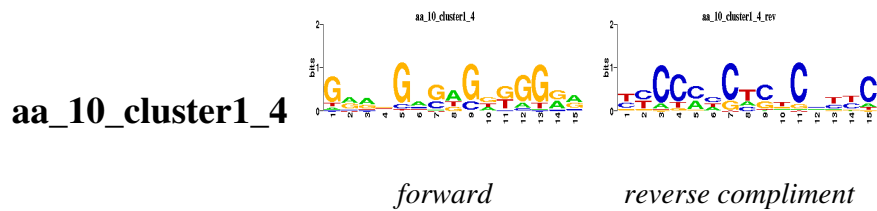

| Name    | E value    | Alignment                      | Motif |
|---------|------------|--------------------------------|-------|
| SORLIP5 | 2.6287e-03 | YYCCMNCNCNCNYC<br>-----CTCACTC |       |

|                           |            |                                                       |                                                                                     |
|---------------------------|------------|-------------------------------------------------------|-------------------------------------------------------------------------------------|
| E2F-variant               | 1.8220e-02 | -GRRNGNGNGNKGGRR<br>GGCGGGAGA-----                    |  |
| EIN3                      | 2.2770e-02 | GRRNGNGNGNKGGRR-----<br>GGATTCAAGGGGGCATGTATCTTGAATCC |  |
| ATB2_AtZIP53_AtZIP44_GBF5 | 5.8095e-02 | GRRNGNGNGNKGGRR<br>--ATGAGT-----                      |  |
| TGA1                      | 6.0368e-02 | YYCCMNCNCNCNYC<br>--CCACGTCA-----                     |  |

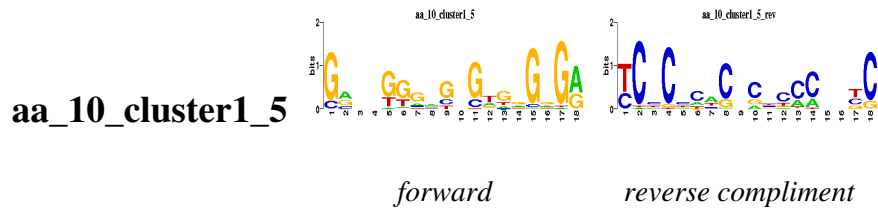

| Name                      | E value    | Alignment                                | Motif                                                                                 |
|---------------------------|------------|------------------------------------------|---------------------------------------------------------------------------------------|
| SORLIP5                   | 3.9470e-05 | TCNCNNNCNCNNCCNNNC<br>---CTCACTC-----    |  |
| E2F-variant               | 1.5414e-02 | GNNNGGNNGNGNNNGNGA<br>-GGCGGGAGA-----    |  |
| TEF-box                   | 2.9816e-02 | TCNCNNNCNCNNCCNNNC<br>-TTACCATTATGCCCT-- |  |
| ATB2_AtZIP53_AtZIP44_GBF5 | 1.7322e-01 | TCNCNNNCNCNNCCNNNC<br>-----ACTCAT-----   |  |
| SORLIP1                   | 1.8318e-01 | GNNNGGNNGNGNNNGNGA<br>-----GTGGCT--      |  |

biop\_10\_cluster2\_2

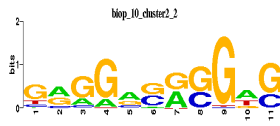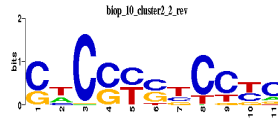*forward**reverse compliment*

| <i>Name</i> | <i>E value</i> | <i>Alignment</i>             | <i>Motif</i> |
|-------------|----------------|------------------------------|--------------|
| E2F-varient | 1.3850e-03     | GRGGNSRSGWG—<br>---GGCGGGAGA |              |
| RAV1-B      | 2.4525e-02     | GRGGNSRSGWG<br>-----CAGGTG   |              |
| Hexamer     | 4.9736e-02     | GRGGNSRSGWG<br>--CGACGG---   |              |
| ABFs        | 5.0832e-02     | GRGGNSRSGWG<br>---GCCACGTG   |              |
| ABRE-like   | 5.9108e-02     | GRGGNSRSGWG<br>---KMCACGTN   |              |

meme\_cluster1\_3

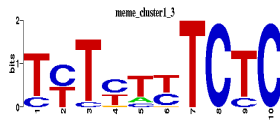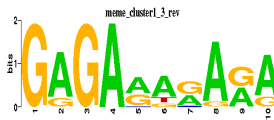*forward**reverse compliment*

| <i>Name</i> | <i>E value</i> | <i>Alignment</i>         | <i>Motif</i> |
|-------------|----------------|--------------------------|--------------|
| ARF         | 1.7015e-03     | GAGARARARA<br>GAGACA---- |              |
| ARF1        | 1.7015e-03     | GAGARARARA<br>GAGACA---- |              |

## Stamp Results

09/28/15

SORLIP5 3.0207e-03

GAGARARARA  
GAGTGAG---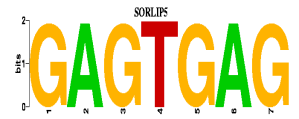

CCA1\_v3 1.2274e-02

-----TYTYTYTCTC  
TCATAGATTTTTTTT--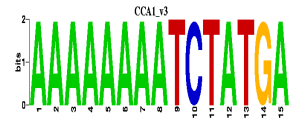

E2F 1.4138e-02

--GAGARARARA  
GCGGGAAA----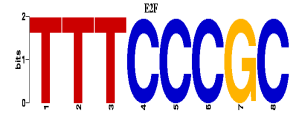

meme\_cluster2\_4

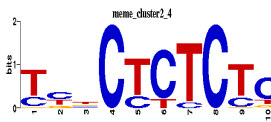*forward*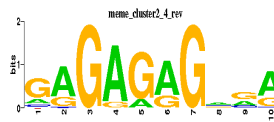*reverse complement**Name**E value**Alignment**Motif*

SORLIP5 4.8964e-05

TYNCTCTCTC  
---CTCACTC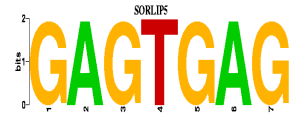

ARF 1.7638e-03

GAGAGAGNRA  
--GAGACA--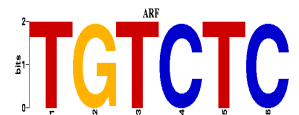

ARF1 1.7638e-03

GAGAGAGNRA  
--GAGACA--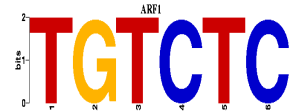

E2F-varient 2.9570e-03

TYNCTCTCTC  
TCTCCCGCC-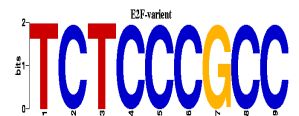

E2F 1.0061e-02

GAGAGAGNRA  
--GCGGGAAA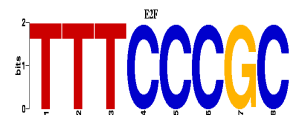

biop\_10\_cluster1\_1

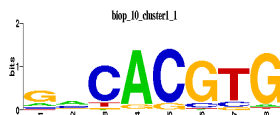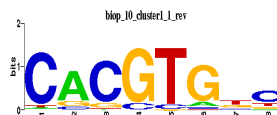

|             | <i>forward</i> | <i>reverse compliment</i> |                                                                                     |
|-------------|----------------|---------------------------|-------------------------------------------------------------------------------------|
| <i>Name</i> | <i>E value</i> | <i>Alignment</i>          | <i>Motif</i>                                                                        |
| ABFs        | 4.9218e-11     | GNCACGTG<br>GCCACGTG      |  |
| ABRE        | 2.1092e-09     | GNCACGTG<br>GCCACGTR      |  |
| G-box       | 5.2985e-09     | GNCACGTG<br>--CACGTG      |  |
| ABRE-like   | 8.1440e-09     | GNCACGTG<br>KMCACGTN      |  |
| ACE         | 5.2527e-08     | GNCACGTG--<br>GACACGTAGA  |  |

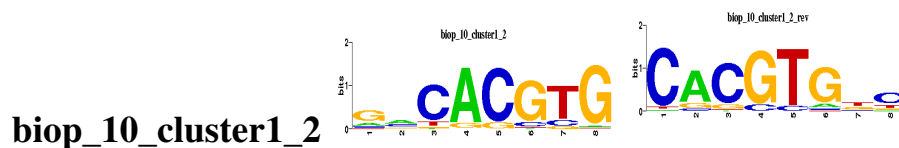

|             | <i>forward</i> | <i>reverse compliment</i> |                                                                                       |
|-------------|----------------|---------------------------|---------------------------------------------------------------------------------------|
| <i>Name</i> | <i>E value</i> | <i>Alignment</i>          | <i>Motif</i>                                                                          |
| ABFs        | 3.2649e-11     | CACGTGNC<br>CACGTGGC      |  |
| ABRE        | 1.5362e-09     | CACGTGNC<br>YACGTGGC      |  |
| G-box       | 5.3569e-09     | CACGTGNC<br>CACGTG--      |  |

ABRE-like 7.4835e-09

CACGTGNC  
NACGTGKM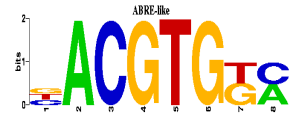

ACE 6.8080e-08

--CACGTGNC  
TCTACGTGTC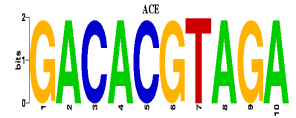

meme\_cluster1\_5

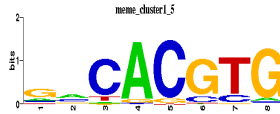*forward*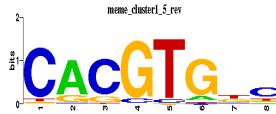*reverse compliment**Name**E value**Alignment**Motif*

ABFs

1.0318e-11

NNCACGTG  
GCCACGTG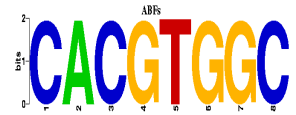

ABRE

4.5077e-10

NNCACGTG  
GCCACGTR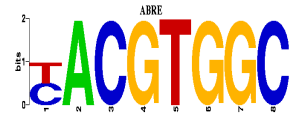

ABRE-like

2.6600e-09

NNCACGTG  
KMCACGTN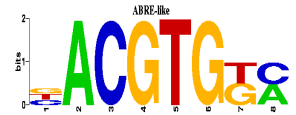

G-box

5.7685e-09

NNCACGTG  
--CACGTG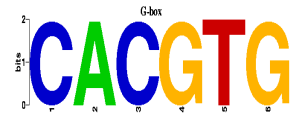

CBF2

8.4437e-08

NNCACGTG-  
-CCACGTGG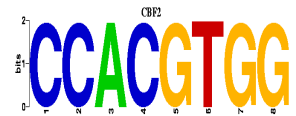

con\_10\_cluster1\_1

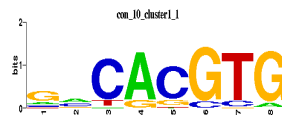*forward*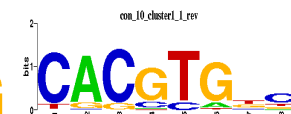*reverse compliment*



| <i>Name</i> | <i>E value</i> | <i>Alignment</i>       | <i>Motif</i> |
|-------------|----------------|------------------------|--------------|
| ABFs        | 6.1569e-12     | NNCACGTG<br>GCCACGTG   |              |
| ABRE        | 1.9523e-10     | NNCACGTG<br>GCCACGTR   |              |
| ABRE-like   | 3.2575e-09     | NNCACGTG<br>KMCACGTN   |              |
| G-box       | 6.3426e-09     | NNCACGTG<br>--CACGTG   |              |
| CBF2        | 5.5909e-08     | NNCACGTG-<br>-CCACGTGG |              |

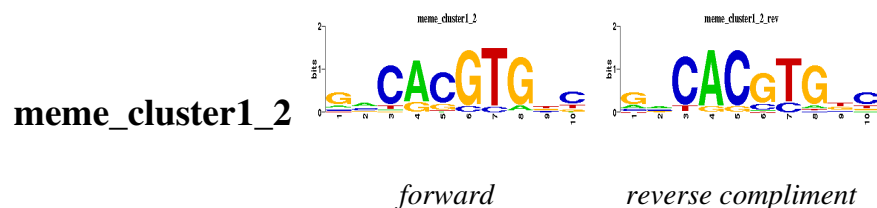

| <i>Name</i> | <i>E value</i> | <i>Alignment</i>         | <i>Motif</i> |
|-------------|----------------|--------------------------|--------------|
| ABFs        | 4.9057e-10     | GNCACGTGNC<br>--CACGTGGC |              |
| ABRE        | 8.6656e-09     | GNCACGTGNC<br>--YACGTGGC |              |
| G-box       | 4.7974e-08     | GNCACGTGNC<br>--CACGTG-- |              |
| ABRE-like   | 6.4696e-08     | GNCACGTGNC<br>KMCACGTN-- |              |

CBF2

7.6291e-08

GNCACGTGNC  
-CCACGTGG-

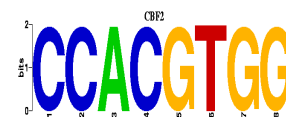

con\_10\_cluster1\_2

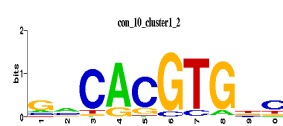*forward*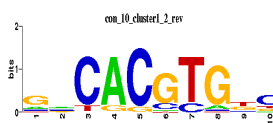*reverse compliment**Name**E value**Alignment**Motif*

ABFs

3.5788e-10

NNCACGTGNC  
GCCACGTG--

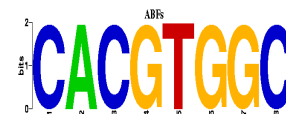

ABRE

8.4367e-09

NNCACGTGNC  
GCCACGTR--

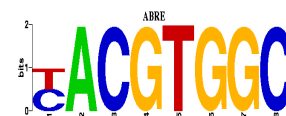

G-box

4.5297e-08

GNCACGTGNN  
--CACGTG--

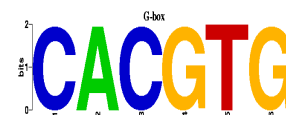

ABRE-like

6.7466e-08

NNCACGTGNC  
KMCACGTN--

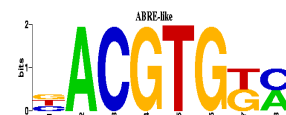

CBF2

1.0407e-07

NNCACGTGNC  
-CCACGTGG-

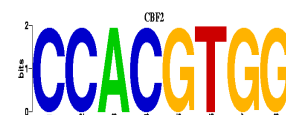

aa\_10\_cluster1\_3

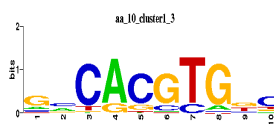*forward*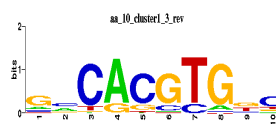*reverse compliment**Name**E value**Alignment**Motif*

## Stamp Results

09/28/15

|          |            |                          |                                                                                     |
|----------|------------|--------------------------|-------------------------------------------------------------------------------------|
| ABFs     | 1.2256e-10 | GNCACGTGNC<br>GCCACGTG-- |  |
| ABRE     | 2.7637e-09 | GNCACGTGNC<br>GCCACGTR-- |  |
| CBF2     | 5.6029e-09 | GNCACGTGNC<br>-CCACGTGG- |  |
| GBF1_2_3 | 5.6029e-09 | GNCACGTGNC<br>-CCACGTGG- |  |
| G-box    | 5.3475e-08 | GNCACGTGNC<br>--CACGTG-- |  |

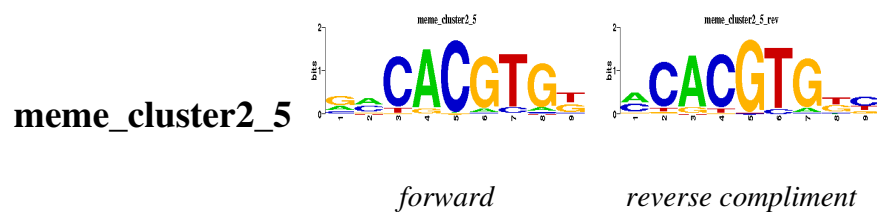

| <i>Name</i> | <i>E value</i> | <i>Alignment</i>       | <i>Motif</i>                                                                          |
|-------------|----------------|------------------------|---------------------------------------------------------------------------------------|
| ABFs        | 3.6560e-11     | MCACGTGKY<br>-CACGTGGC |  |
| ABRE        | 1.2097e-09     | RMACGTGK<br>GCCACGTR-  |  |
| CBF2        | 2.4678e-09     | MCACGTGKY<br>CCACGTGG- |  |
| GBF1_2_3    | 2.4678e-09     | MCACGTGKY<br>CCACGTGG- |  |
| G-box       | 1.4540e-08     | MCACGTGKY<br>-CACGTG-- |  |

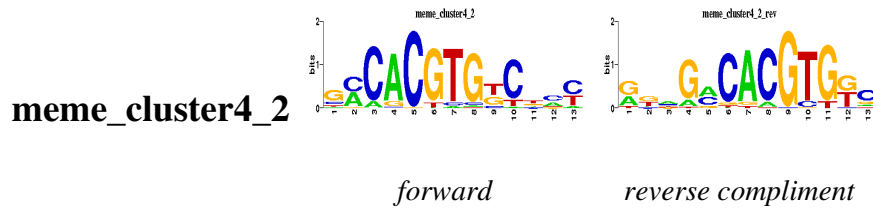

| Name     | E value    | Alignment                      | Motif |
|----------|------------|--------------------------------|-------|
| ABFs     | 4.5627e-10 | GMCACGTGKCNMY<br>GCCACGTG----- |       |
| ABRE     | 1.5589e-08 | GMCACGTGKCNMY<br>GCCACGTR----- |       |
| CBF2     | 6.5834e-08 | GMCACGTGKCNMY<br>-CCACGTGG---- |       |
| GBF1_2_3 | 6.5834e-08 | GMCACGTGKCNMY<br>-CCACGTGG---- |       |
| G-box    | 1.3804e-07 | GMCACGTGKCNMY<br>--CACGTG----- |       |

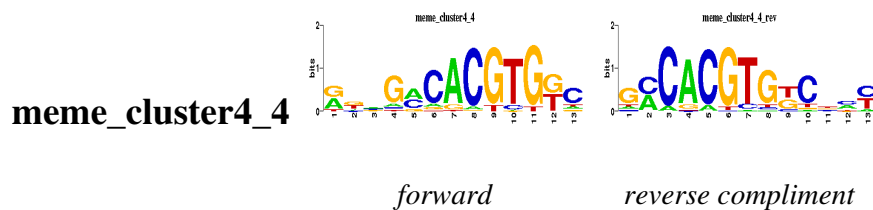

| Name | E value    | Alignment                      | Motif |
|------|------------|--------------------------------|-------|
| ABFs | 2.9884e-10 | GMCACGTGKCNMY<br>GCCACGTG----- |       |
| ABRE | 1.5176e-08 | GMCACGTGKCNMY<br>GCCACGTR----- |       |

## Stamp Results

09/28/15

|          |            |                                 |                                                                                     |
|----------|------------|---------------------------------|-------------------------------------------------------------------------------------|
| CBF2     | 2.9740e-08 | RNNGMCACGTGKC<br>----CCACGTGG-- |  |
| GBF1_2_3 | 2.9740e-08 | RNNGMCACGTGKC<br>----CCACGTGG-- |  |
| G-box    | 1.3818e-07 | GMCACGTGKCNNY<br>--CACGTG-----  |  |

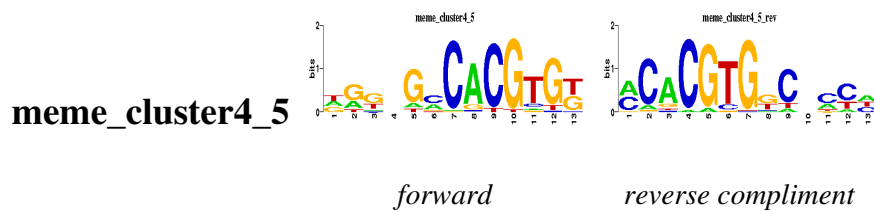

| <i>Name</i> | <i>E value</i> | <i>Alignment</i>                | <i>Motif</i>                                                                          |
|-------------|----------------|---------------------------------|---------------------------------------------------------------------------------------|
| ABFs        | 8.9105e-11     | NGKNGMCACGTGK<br>----GCCACGTG-- |   |
| CBF2        | 4.6778e-09     | NGKNGMCACGTGK<br>-----CCACGTGG  |  |
| GBF1_2_3    | 4.6778e-09     | NGKNGMCACGTGK<br>-----CCACGTGG  |  |
| ABRE        | 6.8482e-09     | NGKNGMCACGTGK<br>----GCCACGTR-- |  |
| G-box       | 1.3064e-07     | MCACGTGKCNMCN<br>-CACGTG-----   |  |

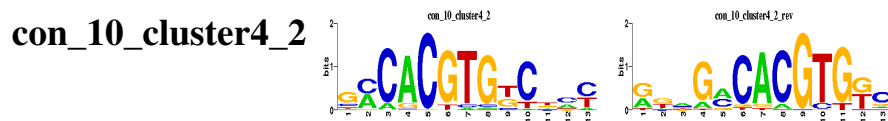

|             | <i>forward</i> | <i>reverse compliment</i>       |                                                                                     |
|-------------|----------------|---------------------------------|-------------------------------------------------------------------------------------|
| <i>Name</i> | <i>E value</i> | <i>Alignment</i>                | <i>Motif</i>                                                                        |
| ABFs        | 4.5627e-10     | GMCACGTGKCNMY<br>GCCACGTG-----  |  |
| ABRE        | 1.5589e-08     | GMCACGTGKCNMY<br>GCCACGTR-----  |  |
| CBF2        | 6.5834e-08     | GMCACGTGKCNMY<br>-CCACGTGG----- |  |
| GBF1_2_3    | 6.5834e-08     | GMCACGTGKCNMY<br>-CCACGTGG----- |  |
| G-box       | 1.3804e-07     | GMCACGTGKCNMY<br>--CACGTG-----  |  |

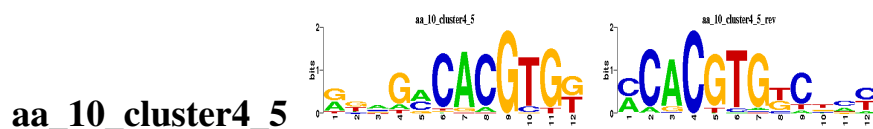

|             | <i>forward</i> | <i>reverse compliment</i>     |                                                                                       |
|-------------|----------------|-------------------------------|---------------------------------------------------------------------------------------|
| <i>Name</i> | <i>E value</i> | <i>Alignment</i>              | <i>Motif</i>                                                                          |
| ABFs        | 2.7376e-09     | RKNGMCACGTGK<br>---GCCACGTG-- |  |
| CBF2        | 2.6624e-08     | MCACGTGKCNMY<br>CCACGTGG----- |  |
| GBF1_2_3    | 2.6624e-08     | MCACGTGKCNMY<br>CCACGTGG----- |  |
| G-box       | 1.0105e-07     | RKNGMCACGTGK<br>-----CACGTG-- |  |

ABRE

1.1506e-07

RKNGMCACGTGK  
 ---GCCACGTR--

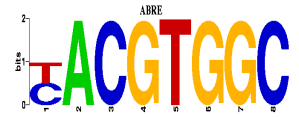

biop\_10\_cluster4\_1

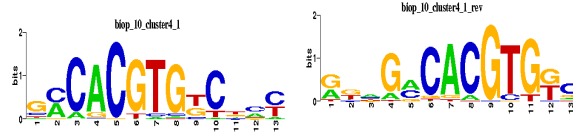*forward**reverse compliment**Name**E value**Alignment**Motif*

ABFs

4.5627e-10

GMCACGTGKCNMY  
 GCCACGTG-----

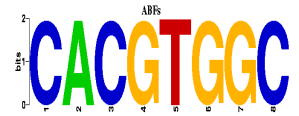

ABRE

1.5589e-08

GMCACGTGKCNMY  
 GCCACGTR-----

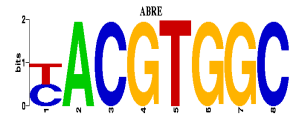

CBF2

6.5834e-08

GMCACGTGKCNMY  
 --CCACGTGG----

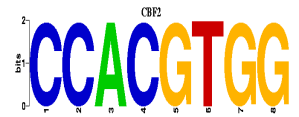

GBF1\_2\_3

6.5834e-08

GMCACGTGKCNMY  
 --CCACGTGG----

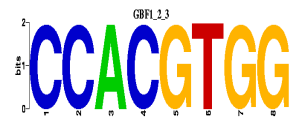

G-box

1.3804e-07

GMCACGTGKCNMY  
 --CACGTG-----

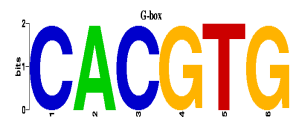

biop\_10\_cluster4\_2

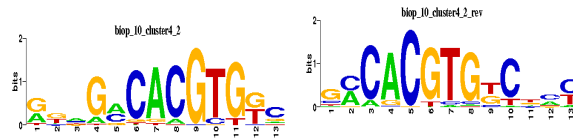*forward**reverse compliment**Name**E value**Alignment**Motif*

## Stamp Results

09/28/15

|          |            |                                 |                                                                                     |
|----------|------------|---------------------------------|-------------------------------------------------------------------------------------|
| ABFs     | 4.5627e-10 | GMCACGTGKCNMY<br>GCCACGTG-----  |  |
| ABRE     | 1.5589e-08 | GMCACGTGKCNMY<br>GCCACGTR-----  |  |
| CBF2     | 6.5834e-08 | RKNGMCACGTGKC<br>----CCACGTGG-- |  |
| GBF1_2_3 | 6.5834e-08 | RKNGMCACGTGKC<br>----CCACGTGG-- |  |
| G-box    | 1.3804e-07 | GMCACGTGKCNMY<br>--CACGTG-----  |  |

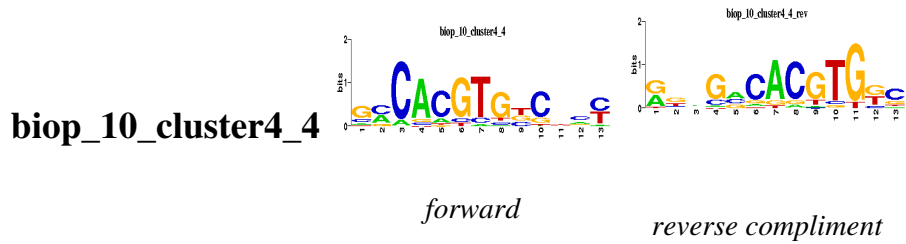

| <i>Name</i> | <i>E value</i> | <i>Alignment</i>                | <i>Motif</i>                                                                          |
|-------------|----------------|---------------------------------|---------------------------------------------------------------------------------------|
| ABFs        | 3.9958e-10     | GMCACGTGNCNNY<br>GCCACGTG-----  |  |
| ABRE        | 2.3938e-08     | GMCACGTGNCNNY<br>GCCACGTR-----  |  |
| G-box       | 1.5295e-07     | GMCACGTGNCNNY<br>--CACGTG-----  |  |
| CBF2        | 1.6829e-07     | GMCACGTGNCNNY<br>--CCACGTGG---- |  |



GBF1\_2\_3

1.6829e-07

GMCACGTGNCNNY  
-CCACGTGG----

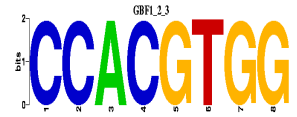

aa\_10\_cluster2\_5

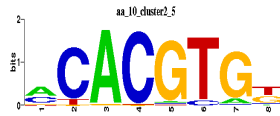*forward*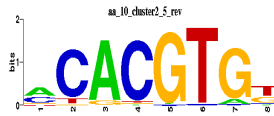*reverse complement**Name**E value**Alignment**Motif*

G-box

4.2821e-09

MCACGTGK  
-CACGTG-

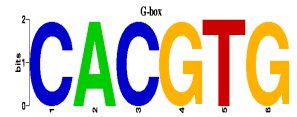

CBF2

5.1085e-09

MCACGTGK  
CCACGTGG

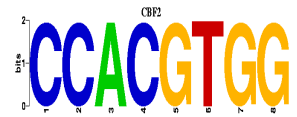

GBF1\_2\_3

5.1085e-09

MCACGTGK  
CCACGTGG

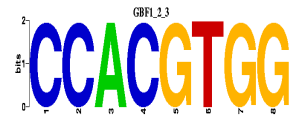

ABFs

5.7683e-08

MCACGTGK-  
-CACGTGGC

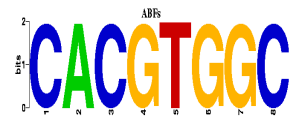

ABRE-like

7.0439e-08

-MCACGTGK  
KMCACGTN-

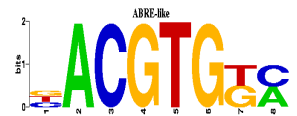

meme\_cluster2\_1

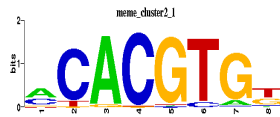*forward*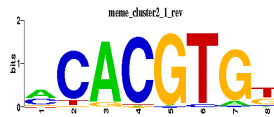*reverse complement**Name**E value**Alignment**Motif*

G-box

4.3084e-09

MCACGTGK  
-CACGTG-

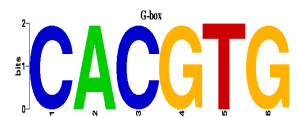

# Stamp Results

09/28/15

|           |            |                        |                                                                                     |
|-----------|------------|------------------------|-------------------------------------------------------------------------------------|
| CBF2      | 8.5899e-09 | MCACGTGK<br>CCACGTGG   | 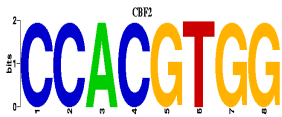 |
| GBF1_2_3  | 8.5899e-09 | MCACGTGK<br>CCACGTGG   |  |
| ABRE-like | 7.9632e-08 | -MCACGTGK<br>KMCACGTN- |  |
| Z-box     | 9.0409e-08 | MCACGTGK<br>ACACGTAT   |  |

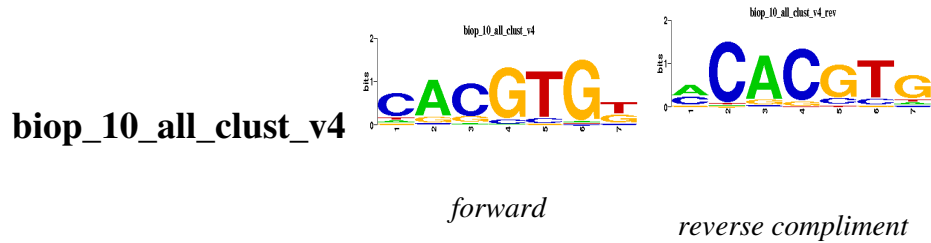

| <i>Name</i> | <i>E value</i> | <i>Alignment</i>     | <i>Motif</i>                                                                          |
|-------------|----------------|----------------------|---------------------------------------------------------------------------------------|
| G-box       | 1.2324e-09     | MCACGTG<br>-CACGTG   |  |
| ABFs        | 6.7752e-09     | -MCACGTG<br>GCCACGTG |  |
| CBF2        | 6.7752e-09     | MCACGTG-<br>CCACGTGG |  |
| GBF1_2_3    | 6.7752e-09     | MCACGTG-<br>CCACGTGG |  |
| ABRE-like   | 1.8273e-08     | -MCACGTG<br>KMCACGTN |  |

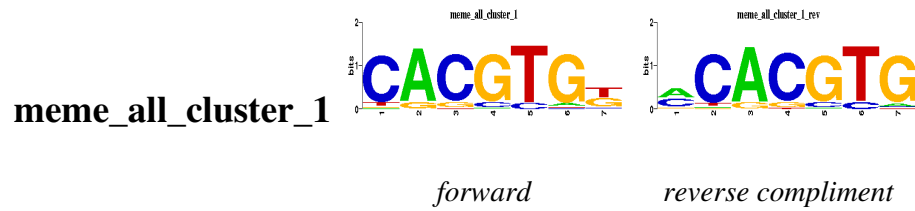

| Name      | E value    | Alignment            | Motif |
|-----------|------------|----------------------|-------|
| G-box     | 1.1774e-09 | CACGTGK<br>CACGTG-   |       |
| ABFs      | 2.2400e-09 | -MCACGTG<br>GCCACGTG |       |
| CBF2      | 2.2400e-09 | MCACGTG-<br>CCACGTGG |       |
| GBF1_2_3  | 2.2400e-09 | MCACGTG-<br>CCACGTGG |       |
| ABRE-like | 9.5612e-09 | -MCACGTG<br>KMCACGTN |       |

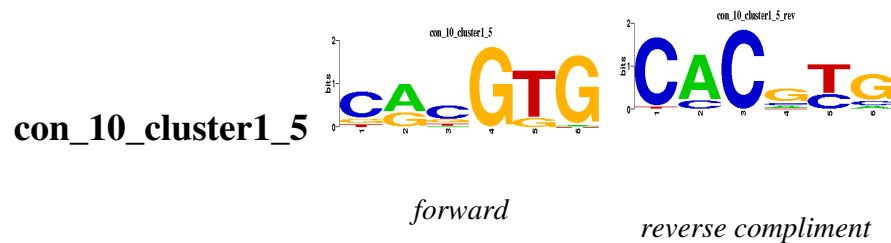

| Name  | E value    | Alignment            | Motif |
|-------|------------|----------------------|-------|
| G-box | 4.5925e-10 | CACGTG<br>CACGTG     |       |
| ABFs  | 2.9924e-08 | --CACGTG<br>GCCACGTG |       |

|          |            |                      |                                                                                     |
|----------|------------|----------------------|-------------------------------------------------------------------------------------|
| CBF2     | 2.9924e-08 | -CACGTG-<br>CCACGTGG |  |
| GBF1_2_3 | 2.9924e-08 | -CACGTG-<br>CCACGTGG |  |
| ABRE     | 9.0519e-07 | --CACGTG<br>GCCACGTR |  |

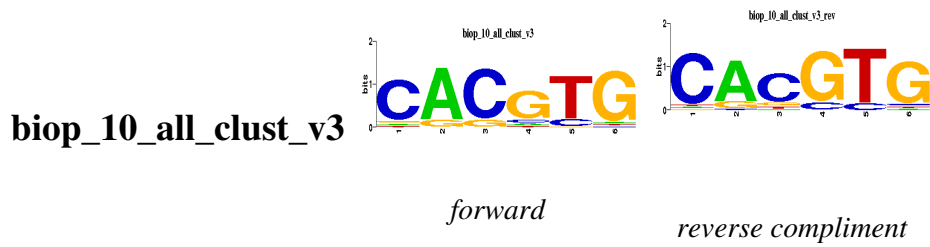

| <i>Name</i> | <i>E value</i> | <i>Alignment</i>     | <i>Motif</i>                                                                          |
|-------------|----------------|----------------------|---------------------------------------------------------------------------------------|
| G-box       | 6.2438e-11     | CACGTG<br>CACGTG     |  |
| ABFs        | 5.4690e-09     | --CACGTG<br>GCCACGTG |  |
| CBF2        | 5.4690e-09     | -CACGTG-<br>CCACGTGG |  |
| GBF1_2_3    | 5.4690e-09     | -CACGTG-<br>CCACGTGG |  |
| ABRE        | 2.4512e-07     | --CACGTG<br>GCCACGTR |  |

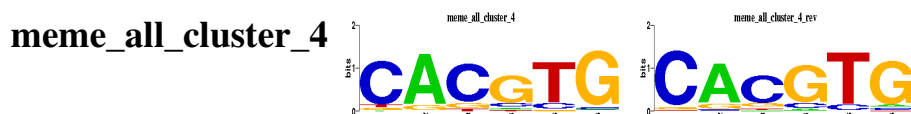

|             | <i>forward</i> | <i>reverse compliment</i> |                                                                                     |
|-------------|----------------|---------------------------|-------------------------------------------------------------------------------------|
| <i>Name</i> | <i>E value</i> | <i>Alignment</i>          | <i>Motif</i>                                                                        |
| G-box       | 5.4745e-11     | CACGTG<br>CACGTG          | 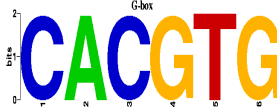 |
| ABFs        | 4.8887e-09     | --CACGTG<br>GCCACGTG      |  |
| CBF2        | 4.8887e-09     | -CACGTG-<br>CCACGTGG      |  |
| GBF1_2_3    | 4.8887e-09     | -CACGTG-<br>CCACGTGG      |  |
| ABRE        | 1.9855e-07     | --CACGTG<br>GCCACGTR      |  |

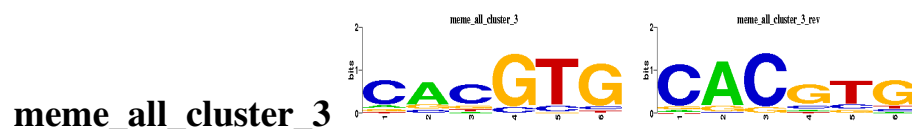

|             | <i>forward</i> | <i>reverse compliment</i> |                                                                                       |
|-------------|----------------|---------------------------|---------------------------------------------------------------------------------------|
| <i>Name</i> | <i>E value</i> | <i>Alignment</i>          | <i>Motif</i>                                                                          |
| G-box       | 5.9453e-11     | CACGTG<br>CACGTG          | 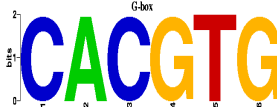 |
| ABFs        | 5.2451e-09     | --CACGTG<br>GCCACGTG      |  |
| CBF2        | 5.2451e-09     | -CACGTG-<br>CCACGTGG      |  |
| GBF1_2_3    | 5.2451e-09     | -CACGTG-<br>CCACGTGG      |  |

ABRE

3.3526e-07

--CACGTG  
GCCACGTR



biop\_10\_cluster2\_4

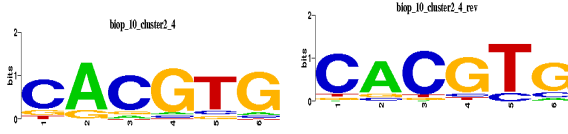*forward**reverse compliment**Name**E value**Alignment**Motif*

G-box

6.9934e-11

CACGTG  
CACGTG

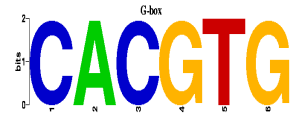

ABFs

6.0243e-09

--CACGTG  
GCCACGTG

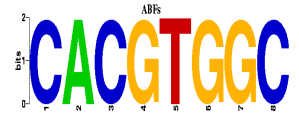

CBF2

6.0243e-09

-CACGTG-  
CCACGTGG

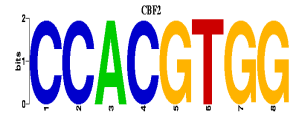

GBF1\_2\_3

6.0243e-09

-CACGTG-  
CCACGTGG

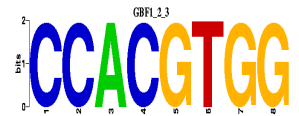

ABRE

2.2064e-07

--CACGTG  
GCCACGTR

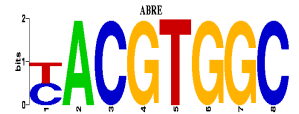

meme\_cluster4\_1

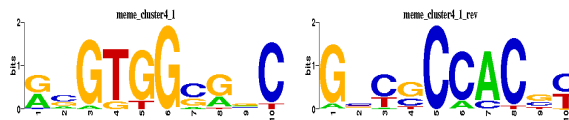*forward**reverse compliment**Name**E value**Alignment**Motif*

# Stamp Results

09/28/15

|         |            |                             |                                                                                     |
|---------|------------|-----------------------------|-------------------------------------------------------------------------------------|
| ERF1    | 3.7384e-07 | RNGTGGSGNC<br>----GGCGGC    |  |
| GCC-box | 3.7384e-07 | RNGTGGSGNC<br>----GGCGGC    |  |
| ABFs    | 7.9180e-06 | GNCSCCACNY--<br>---GCCACGTG |  |
| ABRE    | 7.9180e-06 | GNCSCCACNY--<br>---GCCACGTR |  |
| SORLIP1 | 1.9452e-04 | RNGTGGSGNC<br>--GTGGCT--    |  |

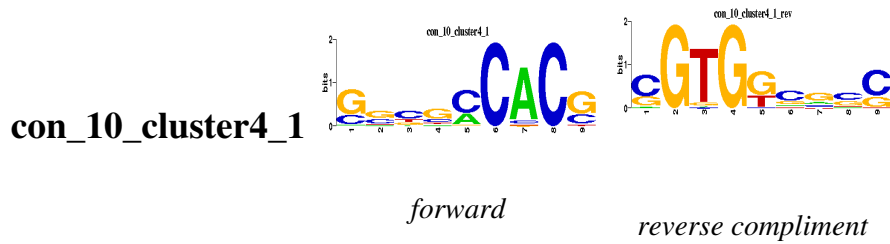

| <i>Name</i> | <i>E value</i> | <i>Alignment</i>           | <i>Motif</i>                                                                          |
|-------------|----------------|----------------------------|---------------------------------------------------------------------------------------|
| ABFs        | 2.5416e-05     | GSNSCCACG--<br>---GCCACGTG |  |
| ABRE        | 2.5416e-05     | GSNSCCACG--<br>---GCCACGTR |  |
| ERF1        | 5.4767e-05     | CGTGGNSNC<br>---GGCGGC     |  |
| GCC-box     | 5.4767e-05     | CGTGGNSNC<br>---GGCGGC     |  |

SORLIP1

1.0639e-04

CGTGGSNSC

-GTGGCT--

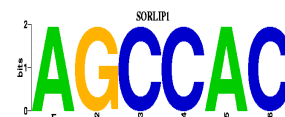

con\_10\_cluster4\_4

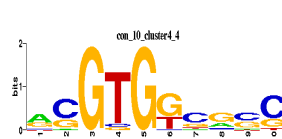*forward*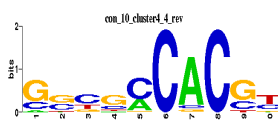*reverse compliment**Name**E value**Alignment**Motif*

ABFs

1.2568e-07

GSYGCCACGY-  
---GCCACGTG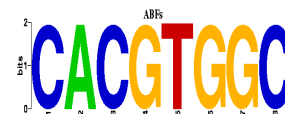

ABRE

1.2568e-07

GSYGCCACGY-  
---GCCACGTR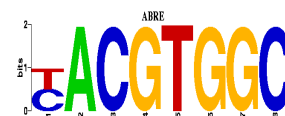

ABRE-like

2.9189e-06

GSYGCCACGY-  
---KMCACGTN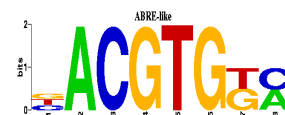

ERF1

5.3387e-05

RCGTGGCRSC  
----GGCGGC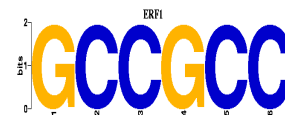

GCC-box

5.3387e-05

RCGTGGCRSC  
----GGCGGC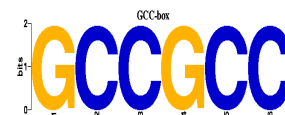

biop\_10\_cluster4\_3

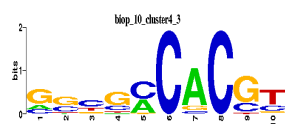*forward*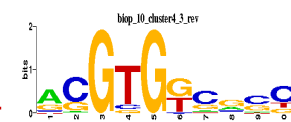*reverse compliment**Name**E value**Alignment**Motif*



## Stamp Results

09/28/15

|           |            |                                |                                                                                     |
|-----------|------------|--------------------------------|-------------------------------------------------------------------------------------|
| ABFs      | 2.0624e-07 | GSNGMCACGT--<br>---GCCACGTG    |  |
| ABRE      | 2.0624e-07 | GSNGMCACGT--<br>---GCCACGTR    |  |
| ABRE-like | 1.2093e-06 | GSNGMCACGT--<br>---KMCACGTN    |  |
| ACE       | 6.6804e-05 | GSNGMCACGT---<br>---GACACGTAGA |  |
| CBF2      | 1.2243e-04 | GSNGMCACGT--<br>----CCACGTGG   |  |

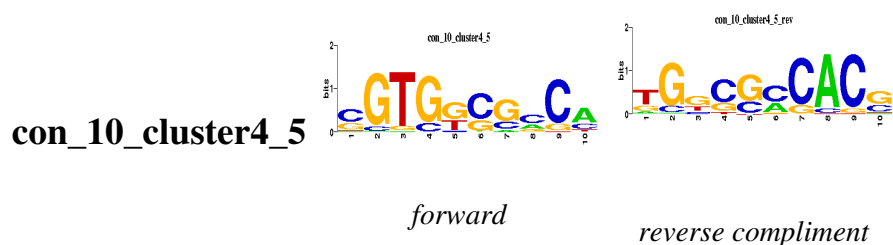

| <i>Name</i> | <i>E value</i> | <i>Alignment</i>             | <i>Motif</i>                                                                          |
|-------------|----------------|------------------------------|---------------------------------------------------------------------------------------|
| ABFs        | 1.3922e-04     | TGKCGMCACS--<br>----GCCACGTG |  |
| ABRE        | 1.3922e-04     | TGKCGMCACS--<br>----GCCACGTR |  |
| SORLIP1     | 4.0606e-04     | SGTGKCGMCA<br>-GTGGCT---     |  |
| ABRE-like   | 1.5073e-03     | TGKCGMCACS--<br>----KMCACGTN |  |

ERF1

2.4920e-03

TGKCGMCACS  
-GCCGCC---

con\_10\_cluster4\_3

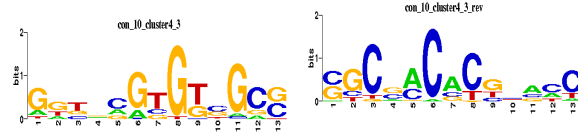*forward**reverse compliment**Name**E value**Alignment**Motif*

ACE

6.2490e-05

SGCSACACKNNNC  
---GACACGTAGA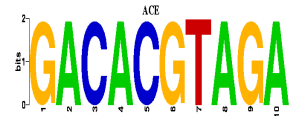

Z-box

1.1623e-04

SGCSACACKNNNC  
----ACACGTAT-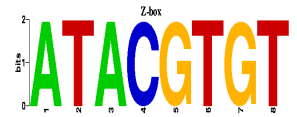

ABRE-like

1.2366e-04

SGCSACACKNNNC  
---KMCACGTN--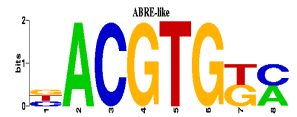

ABRE

1.7706e-04

SGCSACACKNNNC  
---GCCACGTR--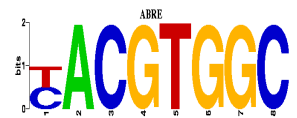

ABFs

4.4369e-03

SGCSACACKNNNC  
---GCCACGTG--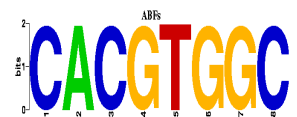

biop\_10\_cluster4\_5

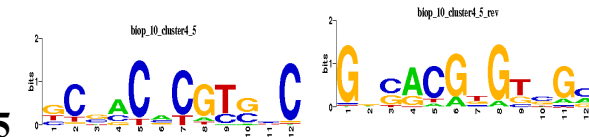*forward**reverse compliment**Name**E value**Alignment**Motif*

|           |            |                               |                                                                                     |
|-----------|------------|-------------------------------|-------------------------------------------------------------------------------------|
| ABFs      | 2.9123e-06 | GNSACGNGKNGN<br>GCCACGTG----  |  |
| G-box     | 3.4761e-06 | GNSACGNGKNGN<br>--CACGTG----  |  |
| ABRE-like | 3.8698e-06 | NCNMCNCGT SNC<br>--KMCACGTN-- |  |
| ABRE      | 2.3570e-05 | GNSACGNGKNGN<br>GCCACGTR----  |  |
| ACE       | 1.1705e-04 | GNSACGNGKNGN<br>TCTACGTGTC--  |  |

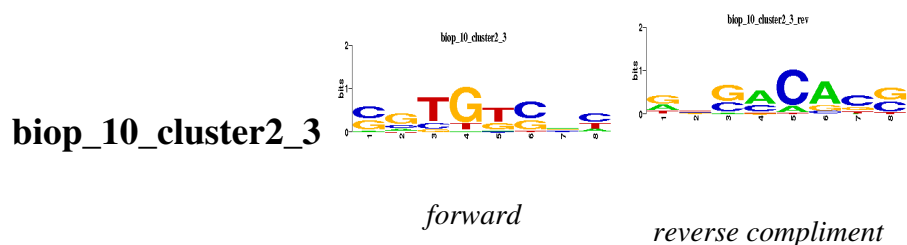

| <i>Name</i> | <i>E value</i> | <i>Alignment</i>              | <i>Motif</i>                                                                          |
|-------------|----------------|-------------------------------|---------------------------------------------------------------------------------------|
| ACE         | 6.1809e-04     | -----SGTGKSNY<br>TCTACGTGTC-- |  |
| ABRE-like   | 2.8663e-03     | RNSMCACS--<br>--KMCACGTN      |  |
| ABFs        | 4.1135e-03     | RNSMCACS--<br>--GCCACGTG      |  |
| ABRE        | 4.1135e-03     | RNSMCACS--<br>--GCCACGTR      |  |

Z-box

6.8578e-03

RNSMCACS---

---ACACGTAT

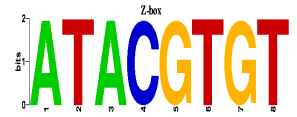

meme\_cluster2\_3

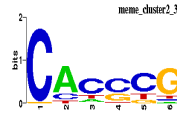*forward*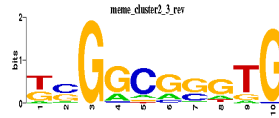*reverse complement**Name**E value**Alignment**Motif*

E2F-variant

3.9617e-06

KSGGCGSGTG-

--GGCGGGAGA

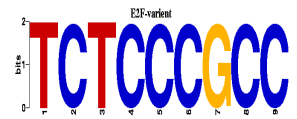

ERF1

2.4954e-04

KSGGCGSGTG

--GGCGGC--

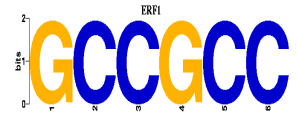

GCC-box

2.4954e-04

KSGGCGSGTG

--GGCGGC--

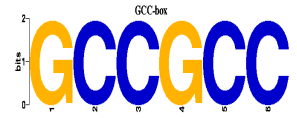

RAV1-B

3.7257e-04

CACSCGCCSM

CACCTG----

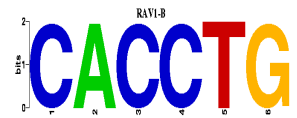

Hexamer

1.0673e-03

CACSCGCCSM

---CCGTG--

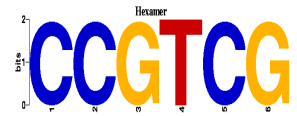

meme\_cluster2\_2

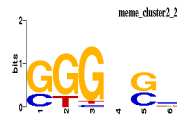*forward*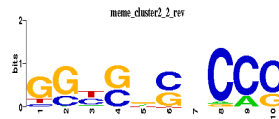*reverse complement**Name**E value**Alignment**Motif*

ERF1

1.3269e-04

GGYSNSNCCC

GGCGGC----

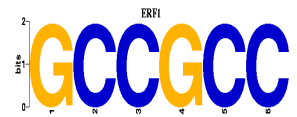

|         |            |                            |                                                                                     |
|---------|------------|----------------------------|-------------------------------------------------------------------------------------|
| GCC-box | 1.3269e-04 | GGYSNSNCCC<br>GGCGGC-----  |  |
| SORLIP2 | 1.1345e-03 | GGYSNSNCCC<br>---GGCCC--   |  |
| CBF1    | 1.8444e-03 | GGYSNSNCCC<br>-GTCGGCCA-   |  |
| ERE     | 7.7552e-03 | GGYSNSNCCC-<br>GGCGGCTCTTA |  |

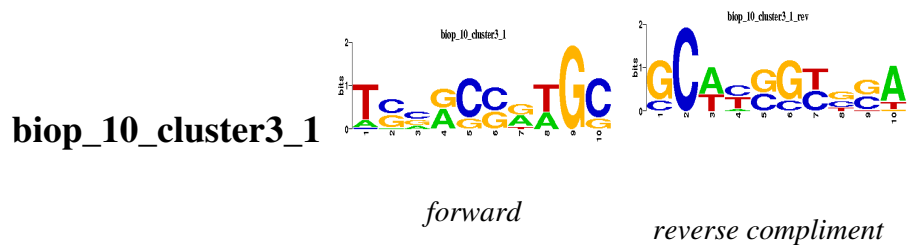

| <i>Name</i> | <i>E value</i> | <i>Alignment</i>                | <i>Motif</i>                                                                          |
|-------------|----------------|---------------------------------|---------------------------------------------------------------------------------------|
| CBF1        | 8.9174e-03     | -TSNRCSRTGC<br>GTCGGCCA---      |  |
| octamer     | 3.9962e-02     | --TSNRCSRTGC<br>GATCCGCG----    |  |
| ERF1        | 7.1048e-02     | GCAYSGYN SA<br>----GGCGGC       |  |
| GCC-box     | 7.1048e-02     | GCAYSGYN SA<br>----GGCGGC       |  |
| RY-repeat   | 8.6815e-02     | ---GCAYSGYN SA<br>CATGCATG----- |  |

## con\_10\_cluster3\_1

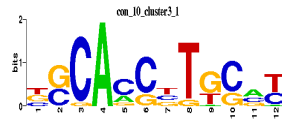*forward*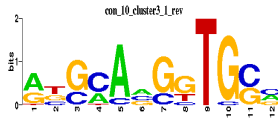*reverse compliment*

| Name | E value | Alignment | Motif |
|------|---------|-----------|-------|
|------|---------|-----------|-------|

|      |            |                                          |  |
|------|------------|------------------------------------------|--|
| CAR2 | 1.7770e-03 | NSCACCNTGCNY-----<br>CTTACCTTTTCATGGATTA |  |
|------|------------|------------------------------------------|--|

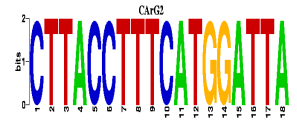

|        |            |                              |  |
|--------|------------|------------------------------|--|
| RAV1-B | 5.3561e-03 | RNGCANGGTGSN<br>----CAGGTG-- |  |
|--------|------------|------------------------------|--|

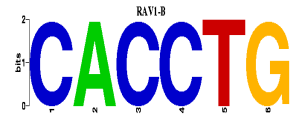

|      |            |                              |  |
|------|------------|------------------------------|--|
| ABFs | 6.6080e-03 | NSCACCNTGCNY<br>--CACGTGGC-- |  |
|------|------------|------------------------------|--|

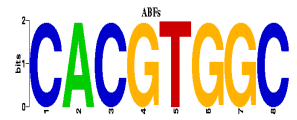

|      |            |                                                      |  |
|------|------------|------------------------------------------------------|--|
| EIN3 | 7.5321e-03 | -----NSCACCNTGCNY--<br>GGATTCAAGATACATGCCCCCTTGAATCC |  |
|------|------------|------------------------------------------------------|--|

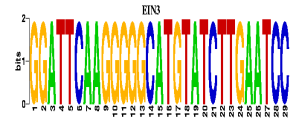

|      |            |                              |  |
|------|------------|------------------------------|--|
| ABRE | 3.2934e-02 | RNGCANGGTGSN<br>--GCCACGTR-- |  |
|------|------------|------------------------------|--|

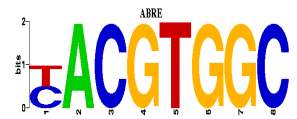

## con\_10\_cluster3\_2

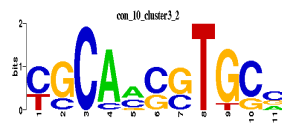*forward*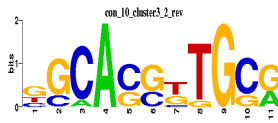*reverse compliment*

| Name | E value | Alignment | Motif |
|------|---------|-----------|-------|
|------|---------|-----------|-------|

|      |            |                             |  |
|------|------------|-----------------------------|--|
| ABFs | 1.3651e-05 | NGCACGKTGCG<br>--CACGTGGC-- |  |
|------|------------|-----------------------------|--|

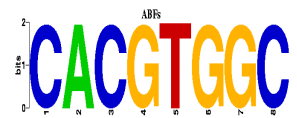

|      |            |                            |  |
|------|------------|----------------------------|--|
| ABRE | 2.2141e-04 | CGCAMCGTGCN<br>-GCCACGTR-- |  |
|------|------------|----------------------------|--|

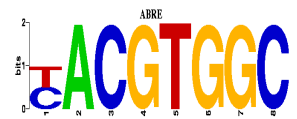

## Stamp Results

09/28/15

CBF2 2.2302e-03

CGCAMCGTGCN  
--CCACGTGG--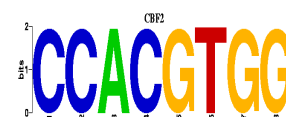

GBF1\_2\_3 2.2302e-03

CGCAMCGTGCN  
--CCACGTGG--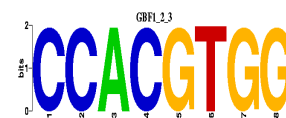

G-box 4.1144e-03

NGCACGKTGCG  
--CACGTG---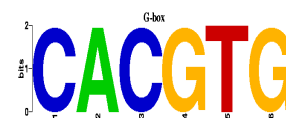

aa\_10\_cluster3\_1

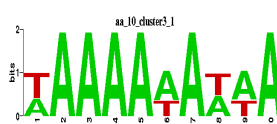*forward*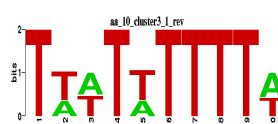*reverse complement**Name**E value**Alignment**Motif*

CCA1\_v3

6.6562e-06

-----TTWTTTTTTW  
TCATAGATTTTTTTT--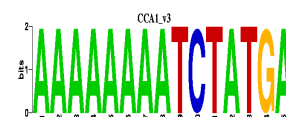

EveningElement

1.8741e-04

TTWTTTTTTW  
AGATATTTT--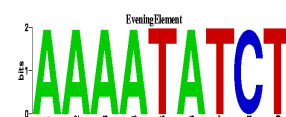

AP1

1.3961e-03

-WAAAAAAWAA  
CTAAAAATGG--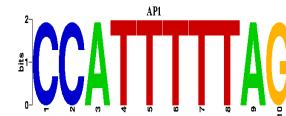

CCA1

2.2145e-03

TTWTTTTTTW  
AGATTKTT--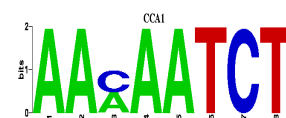

AG\_v3

2.4127e-03

WAAAAAAWAA  
CCAAAAATGG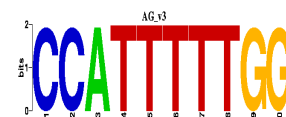

aa\_10\_all\_cluster\_1

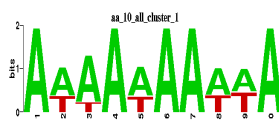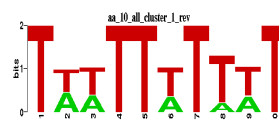

*forward**reverse compliment*

| <i>Name</i> | <i>E value</i> | <i>Alignment</i> | <i>Motif</i> |
|-------------|----------------|------------------|--------------|
|-------------|----------------|------------------|--------------|

|         |            |                                     |  |
|---------|------------|-------------------------------------|--|
| CCA1_v3 | 7.1473e-08 | -----TWTTTTTTTT<br>TCATAGATTTTTTTTT |  |
|---------|------------|-------------------------------------|--|

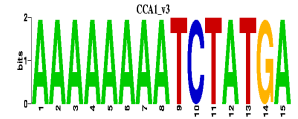

|       |            |                                      |  |
|-------|------------|--------------------------------------|--|
| AG_v4 | 1.1289e-03 | -----TWTTTTTTTT-<br>TTTCCTATTCTGTTTT |  |
|-------|------------|--------------------------------------|--|

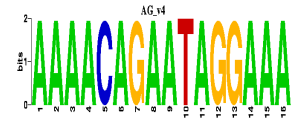

|      |            |                                       |  |
|------|------------|---------------------------------------|--|
| AGL2 | 2.0531e-03 | -TWTTTTTTTT-----<br>NTWWCYAWWWWTGGNWN |  |
|------|------------|---------------------------------------|--|

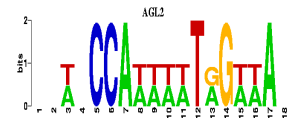

|       |            |                          |  |
|-------|------------|--------------------------|--|
| ATHB6 | 2.6062e-03 | AAAAAAAAWA<br>-TAATAATTG |  |
|-------|------------|--------------------------|--|

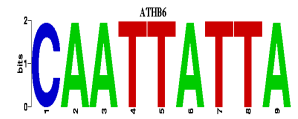

|     |            |                          |  |
|-----|------------|--------------------------|--|
| AP1 | 3.6902e-03 | TWTTTTTTTT<br>CCATTTTATG |  |
|-----|------------|--------------------------|--|

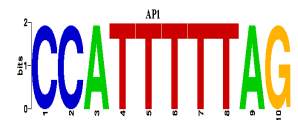

aa\_10\_cluster1\_1

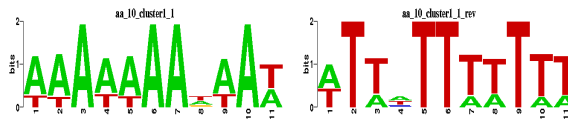*forward**reverse compliment*

| <i>Name</i> | <i>E value</i> | <i>Alignment</i> | <i>Motif</i> |
|-------------|----------------|------------------|--------------|
|-------------|----------------|------------------|--------------|

|         |            |                                         |  |
|---------|------------|-----------------------------------------|--|
| CCA1_v3 | 9.5610e-07 | -----WTTNTTTTTTTT<br>TCATAGATTTTTTTTT-- |  |
|---------|------------|-----------------------------------------|--|

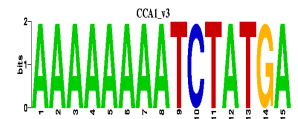

|       |            |                                        |  |
|-------|------------|----------------------------------------|--|
| AG_v4 | 3.8802e-04 | -----WTTNTTTTTTTT<br>TTTCCTATTCTGTTTT- |  |
|-------|------------|----------------------------------------|--|

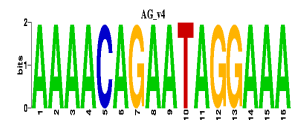

|                |            |                             |  |
|----------------|------------|-----------------------------|--|
| EveningElement | 1.6909e-03 | AAAAAANAAW-<br>---AAAATATCT |  |
|----------------|------------|-----------------------------|--|

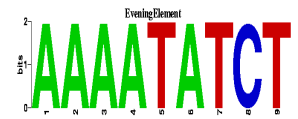

|       |            |                           |  |
|-------|------------|---------------------------|--|
| AG_v3 | 3.1625e-03 | AAAAAANAAW<br>CCAAAAATGG- |  |
|-------|------------|---------------------------|--|

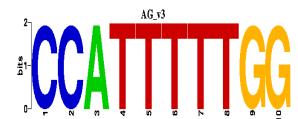



AP1

3.1625e-03

AAAAAANAAW  
CTAAAAATGG-

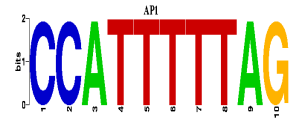

aa\_10\_cluster2\_1

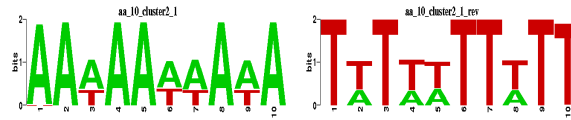*forward**reverse complement**Name**E value**Alignment**Motif*

CCA1\_v3

2.7265e-07

AAAAAAAAA-----  
AAAAAAAAATCTATGA

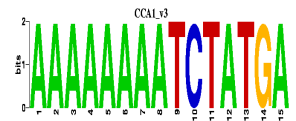

AG\_v2

1.4178e-03

AAAAAAAAA--  
ACTAAAAATGG

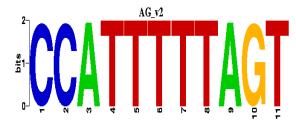

AG\_v4

2.6509e-03

-AAAAAAAAA-----  
AAAACAGAATAGGAAA

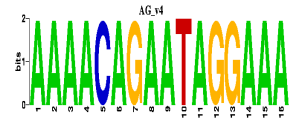

CArG3

3.1380e-03

-----AAAAAAAAA--  
GTTACTAAAAATGGAAAG

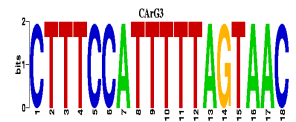

CCA1\_v2

3.3213e-03

AAAAAAAAA  
AAACAATCTA

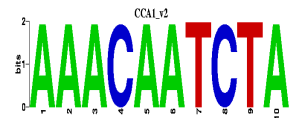

meme\_all\_cluster\_5

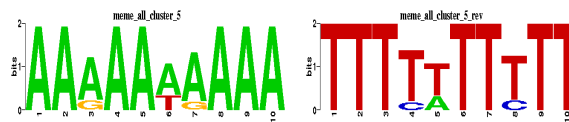*forward**reverse complement**Name**E value**Alignment**Motif*

CCA1\_v3

1.3989e-07

-----TTTTTTTTTT  
TCATAGATTTTTTTT--

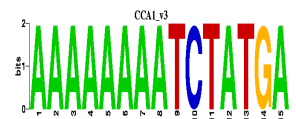

CArG3 4.2201e-04

-----AAAAAAAAAA--  
GTTACTAAAAATGGAAAG

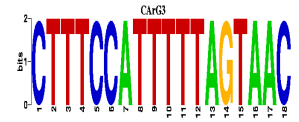

AG\_v4 7.4634e-04

AAAAAAAAAA-----  
AAAACAGAATAGGAAA

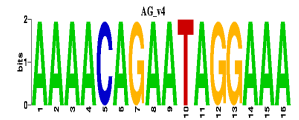

SORLREP2 4.6486e-03

---TTTTTTTTTT  
ACGTTTTAT----

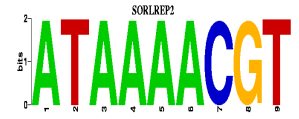

EveningElement 5.2448e-03

TTTTTTTTTT  
AGATATTTT-

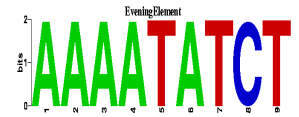

aa\_10\_all\_cluster\_2

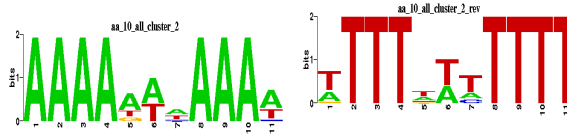*forward**reverse complement**Name**E value**Alignment**Motif*

CCA1\_v3

3.6212e-06

AAAAAWNAAW-----  
--AAAAAAAATCTATGA

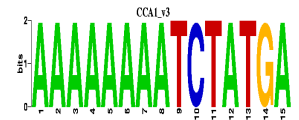

CArG3

5.6222e-05

-----AAAAAWNAAW-  
GTTACTAAAAATGGAAAG

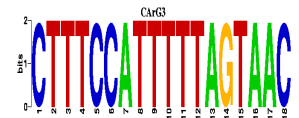

Bellringer\_replumless\_pennywise 5.2955e-04

WTTTNWTTTTT  
--YTAATTT--

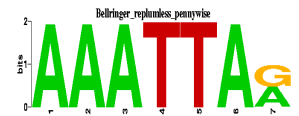

AGL3

3.9670e-03

-----AAAAAWNAAW  
TTWCYAWWWTRGWAA

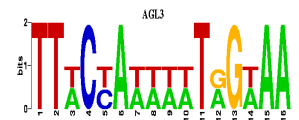

AG\_v4

4.7760e-03

AAAAAWNAAW-----  
AAAACAGAATAGGAAA

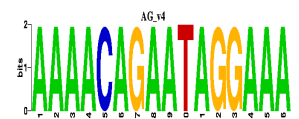

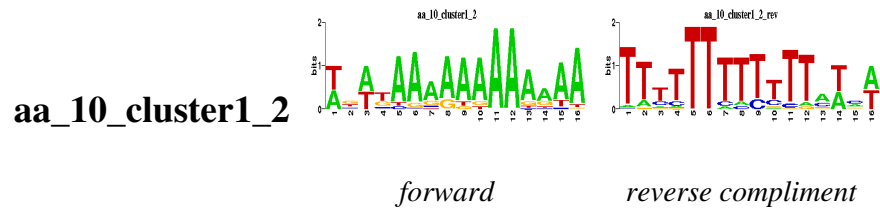

| <i>Name</i> | <i>E value</i> | <i>Alignment</i>                                 | <i>Motif</i> |
|-------------|----------------|--------------------------------------------------|--------------|
| CCA1_v3     | 1.8433e-04     | WNWKAIAAAAAAAAAA-----<br>-----AAAAAAAAATCTATGA   |              |
| CAR3        | 3.5288e-04     | -WNWKAIAAAAAAAAAA-<br>GTTACTAAAAATGGAAAG         |              |
| GATA        | 4.1154e-04     | TTTTTTTTTTTTTMMWNW<br>-----YTATCW                |              |
| CAR1        | 6.6231e-04     | TTTTTTTTTTTTTMMWNW--<br>TTTCCATTTATGTAAAC        |              |
| PII         | 2.0518e-03     | -----WNWKAIAAAAAAAAAA<br>TTGGTTTGTATCAAAACCAA--- |              |

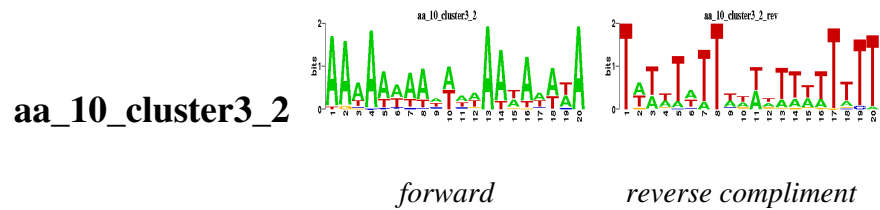

| <i>Name</i> | <i>E value</i> | <i>Alignment</i>                              | <i>Motif</i> |
|-------------|----------------|-----------------------------------------------|--------------|
| CCA1_v3     | 6.8505e-06     | TWTWTWTTWWNTTWTITTT<br>----TCATAGATTTTTTTT--- |              |
| AG_v4       | 9.2530e-04     | AAAAAWAANWWAAWAWAWA<br>AAAACAGAATAGGAAA----   |              |

## 09/28/15

\_\_\_\_\_

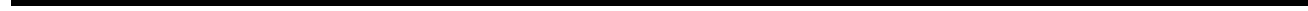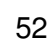

|                                 | <i>forward</i> | <i>reverse compliment</i>                     |                                                                                     |
|---------------------------------|----------------|-----------------------------------------------|-------------------------------------------------------------------------------------|
| <i>Name</i>                     | <i>E value</i> | <i>Alignment</i>                              | <i>Motif</i>                                                                        |
| Bellringer_replumless_pennywise | 9.2666e-04     | -TWWNTTTTTTWWWWWWWT<br>YTAATTT-----           |  |
| AGL3                            | 1.0540e-03     | ---AAWWWWWWAAAAANWWA<br>TTWCYAWWWWTRGWAA----- |  |
| AG                              | 1.4479e-03     | -AAWWWWWWAAAAANWWA<br>NCCWWWWWWGGNAA-----     |  |
| CCA1_v3                         | 2.0689e-03     | ---TWWNTTTTTTWWWWWWWT<br>TCATAGATTTTTTT-----  |  |
| ATHB6                           | 3.8887e-03     | TWWNTTTTTTWWWWWWWT<br>TAATAATTG-----          |  |

## aa\_10\_cluster4\_2

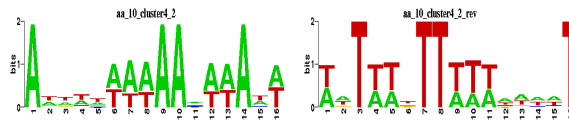

|                | <i>forward</i> | <i>reverse compliment</i>                       |                                                                                       |
|----------------|----------------|-------------------------------------------------|---------------------------------------------------------------------------------------|
| <i>Name</i>    | <i>E value</i> | <i>Alignment</i>                                | <i>Motif</i>                                                                          |
| CCA1_v3        | 2.3128e-04     | ANNWNWAAAAANAWANW-----<br>-----AAAAAAATCTATGA   | 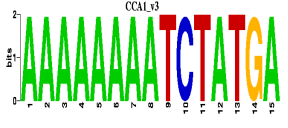 |
| AG             | 1.5480e-03     | -ANNWNWAAAAANAWANW<br>NCCWWWWWWGGNAA---         |  |
| AGL3           | 1.7961e-03     | -----ANNWNWAAAAANAWANW<br>TTWCYAWWWWTRGWAA----- |  |
| EveningElement | 3.7834e-03     | ANNWNWAAAAANAWANW-<br>-----AAAATATCT            |  |

AGL2

7.4264e-03

----ANNWNWAAAAANAWANW  
 NNWNCCAWWWWTRGWWAN--

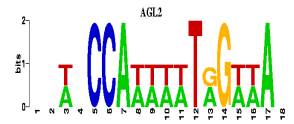

aa\_10\_cluster4\_4

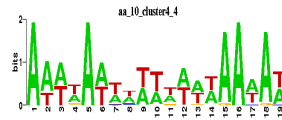*forward*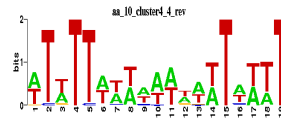*reverse complement**Name**E value**Alignment**Motif*

AGL3

3.9512e-05

AAWWAWWWWWWWWAAWAW  
 ---TTWCYAWWWWTRGWAA

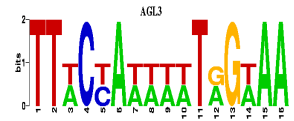

CCA1\_v3

7.7605e-04

WTWTTWWWWWWWWWTWTT  
 ----TCATAGATTTTTTTT

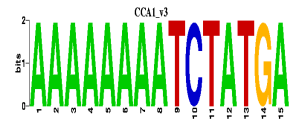

AG

1.3598e-03

WTWTTWWWWWWWWWTWTT  
 TTNCWWWWWWGGN-----

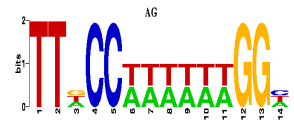

AGL2

1.6321e-03

WTWTTWWWWWWWWWTWTT--  
 ---NTWCYAWWWWTGGNWN

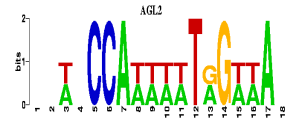

ATHB6

3.0308e-03

WTWTTWWWWWWWWWTWTT--  
 -----TAATAATTG

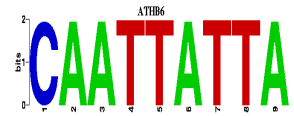

aa\_10\_cluster2\_2

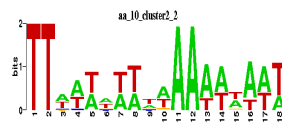*forward*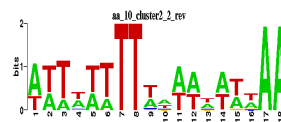*reverse complement**Name**E value**Alignment**Motif*

AGL3

2.9105e-06

TTWWWWWWNWAAWWAWT  
 TTWCYAWWWWTRGWAA--

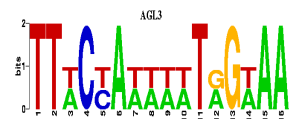

|                                 |            |                                                |                                                                                     |
|---------------------------------|------------|------------------------------------------------|-------------------------------------------------------------------------------------|
| CCA1_v3                         | 1.2740e-03 | -----AWTWTTTWNWWWWWWAA<br>TCATAGATTTTTTTT----- | 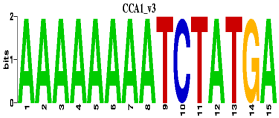 |
| AG                              | 2.9121e-03 | -TTWWWWWWNWA AA WWA WT<br>NCCWWWWWWGGNAA-----  |  |
| ATHB6                           | 4.2320e-03 | AWTWTTTWNWWWWWWAA<br>-----CAATTATTA-           |  |
| Bellringer_replumless_pennywise | 4.4327e-03 | TTWWWWWWNWA AA WWA WT<br>YTAATTT-----          |  |

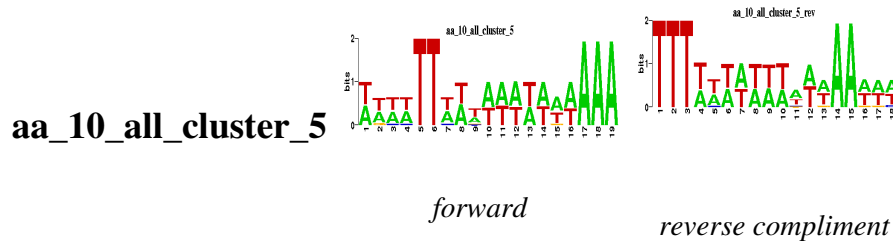

| Name  | E value    | Alignment                                  | Motif                                                                                 |
|-------|------------|--------------------------------------------|---------------------------------------------------------------------------------------|
| AGL3  | 1.6908e-06 | WWWWTTWWWWWWWWAAAA<br>--TTWCYAWWWWTRGWAA-  |  |
| CArg1 | 4.8204e-04 | WWWWTTWWWWWWWWAAAA<br>-GTTTACATAAATGGAAAA  |  |
| AG    | 1.7249e-03 | WWWWTTWWWWWWWWAAAA<br>----NCCWWWWWWGGNAA-  |  |
| ATHB6 | 4.9400e-03 | WWWWTTWWWWWWWWAAAA<br>-CAATTATTA-----      |  |
| AGL2  | 7.4895e-03 | TTTTWWWWWWWWAA WWWW<br>-NNWNCCA WWWWTRGWAN |  |

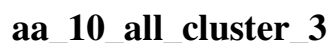

| Name                            | E value    | Alignment                                         | Motif |
|---------------------------------|------------|---------------------------------------------------|-------|
| CCA1_v3                         | 8.7808e-05 | -WWWWAATTAWTTWWWWWW<br>TCATAGATTTTTTTT----        |       |
| ATHB6                           | 4.9783e-04 | WWWWWAAWTAATTWWWW<br>-----TAATAATTG---            |       |
| Bellringer_replumless_pennywise | 6.8918e-04 | WWWWAATTAWTTWWWWWW<br>-----YTAATT-----            |       |
| EveningElement                  | 1.3726e-03 | WWWWAATTAWTTWWWWWW<br>----AGATATTT-----           |       |
| AGL2                            | 1.6064e-03 | WWWWAATTAWTTWWWWWW-----<br>-----NTWWCYAWWWWTGGNWN |       |

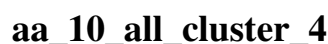

| Name  | E value    | Alignment                            | Motif |
|-------|------------|--------------------------------------|-------|
| AG_v2 | 8.1216e-06 | AAAAAATAAAAAATAAW<br>---ACTAAAAATGG- |       |
| AP1   | 5.1977e-05 | WTTATTTTTATTTTT<br>-CCATTTTTTAG----  |       |



|         |            | aa_10_cluster2_4                              | aa_10_cluster2_4_rev                                                                  |
|---------|------------|-----------------------------------------------|---------------------------------------------------------------------------------------|
|         |            | forward                                       | reverse complement                                                                    |
| Name    | E value    | Alignment                                     | Motif                                                                                 |
| AGL3    | 4.3648e-06 | TWWWWWAWTTTTAAAAW<br>-TTWCYAWWWWTIRGWAA       | 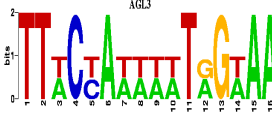  |
| CARg1   | 2.1833e-04 | --TWWWWWAWTTTTAAAAW<br>GTTTACATAAATGGAAAA-    |  |
| CARg3   | 2.8140e-04 | -WTTTTAAAAWTWWWWWA<br>GTTACTAAAAATGGAAAG      |  |
| API     | 2.9440e-04 | TWWWWWAWTTTTAAAAW<br>---CCATTTTITAG---        |  |
| CCA1_v3 | 8.4278e-04 | ---TWWWWWAWTTTTAAAAW<br>TCATAGATTTTTTTTT----- |  |

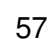

*forward**reverse compliment*

| <i>Name</i> | <i>E value</i> | <i>Alignment</i>                          | <i>Motif</i> |
|-------------|----------------|-------------------------------------------|--------------|
| CArg3       | 3.1400e-04     | --TWWTAAA AWWW-----<br>GTTACTAAAAATGGAAAG |              |
| AP1         | 4.9701e-04     | TWWTAAA AWWW--<br>--CTAAAAATGG            |              |
| AGL2        | 7.3177e-04     | -TWWTAAA AWWW-----<br>NTWWCYA WWWWTTGGNWN |              |
| AG_v2       | 7.5309e-04     | TWWTAAA AWWW--<br>-ACTAAAAATGG            |              |
| SORLREP2    | 9.0117e-04     | WWWT TTTTAWWA<br>ACGTTT TAT--             |              |

Sequence logo generation powered by [weblogo](#)  
 STAMP is written by Shaun Mahony
